# Supplementary material for: Identification of Ellagic Acid Rhamnoside as a Bioactive Component of a Complex Botanical Extract with Anti-biofilm Activity
Source: PubMed Central journal article supplement (PMC5362615; doi:10.3389/fmicb.2017.00496), 2017-03-23

## *Supplementary Material*

### **Identification of Ellagic Acid Rhamnoside as a Bioactive Component of a Complex Botanical Extract with Anti-biofilm Activity**

**Benjamin M. Fontaine<sup>ξ1</sup>, Kate Nelson<sup>ξ2\*</sup>, James T. Lyles<sup>3</sup>, Parth P. Jariwala<sup>1,3</sup>, Jennifer M. García-Rodríguez<sup>1</sup>, Cassandra L. Quave<sup>2,3\*</sup>, Emily E. Weinert<sup>1\*</sup>**

\* **Correspondence:** Cassandra L. Quave: [cassandra.leah.quave@emory.edu](mailto:cassandra.leah.quave@emory.edu); Emily E. Weinert: [emily.weinert@emory.edu](mailto:emily.weinert@emory.edu)

#### **1 Supplementary Data**

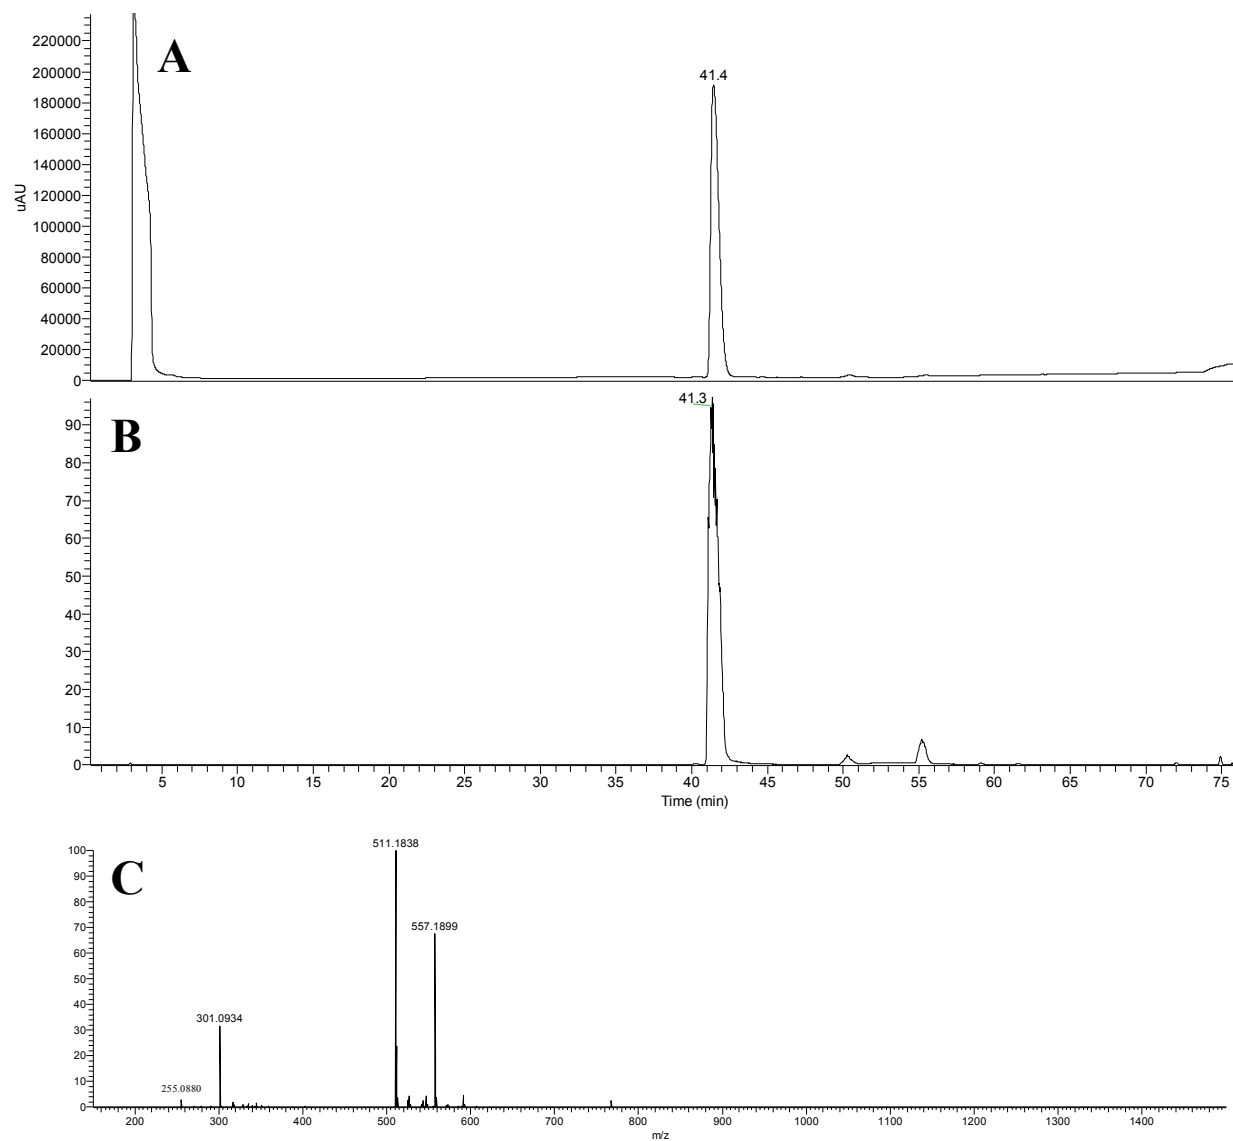

**Figure S1:** FT-MS ESI negative spectra of (A) ellagic acid rhamnoside eluting at 63.3 min, (B) ellagic acid xyloside eluting at 62.5 min, and (C) ellagic acid xyloside 63.7 min in extract 220D-F2.

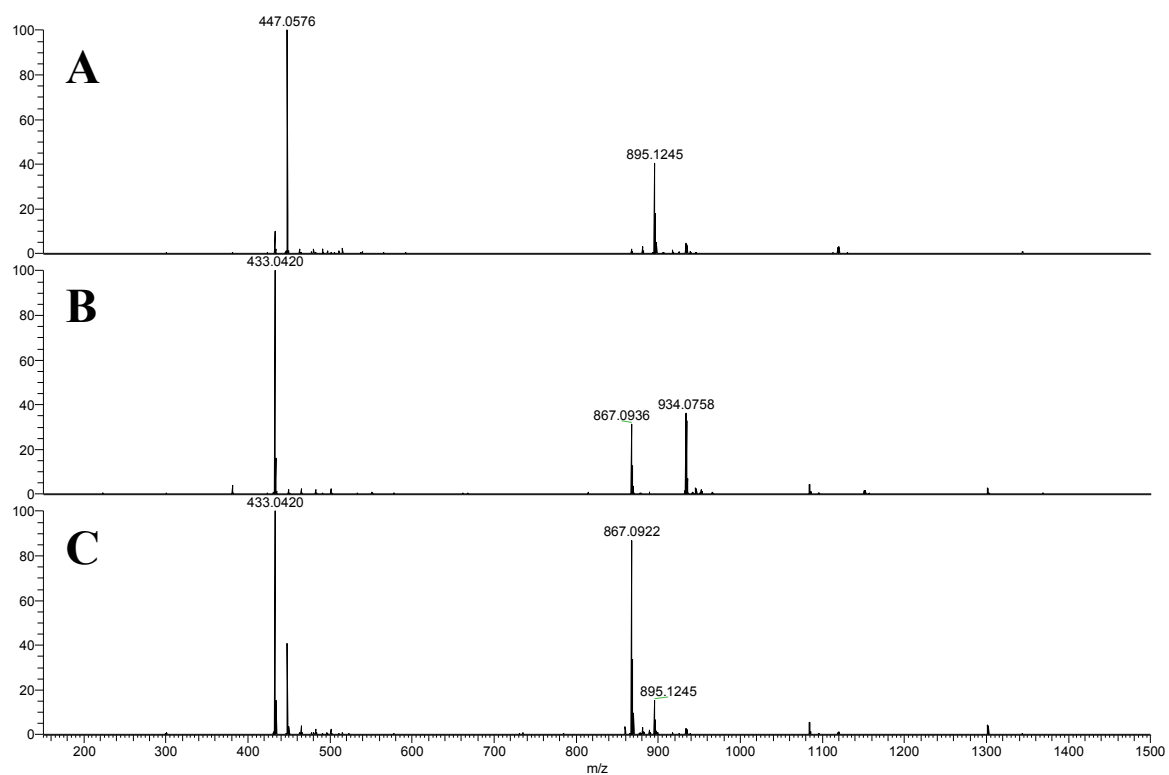

**Figure S2:** Catechol rhamnoside (A) UV-Vis chromatogram 210-500 nm total spectrum, (B) base peak FT-MS chromatogram, and (C) mass spectra of peak at 41.3 min showing  $[M-H]^-$  at  $m/z$  255.0880,  $[M+\text{formate}-H]^-$ ,  $[2M-H]^-$ , and  $[2M+\text{formate}-H]^-$  ions.

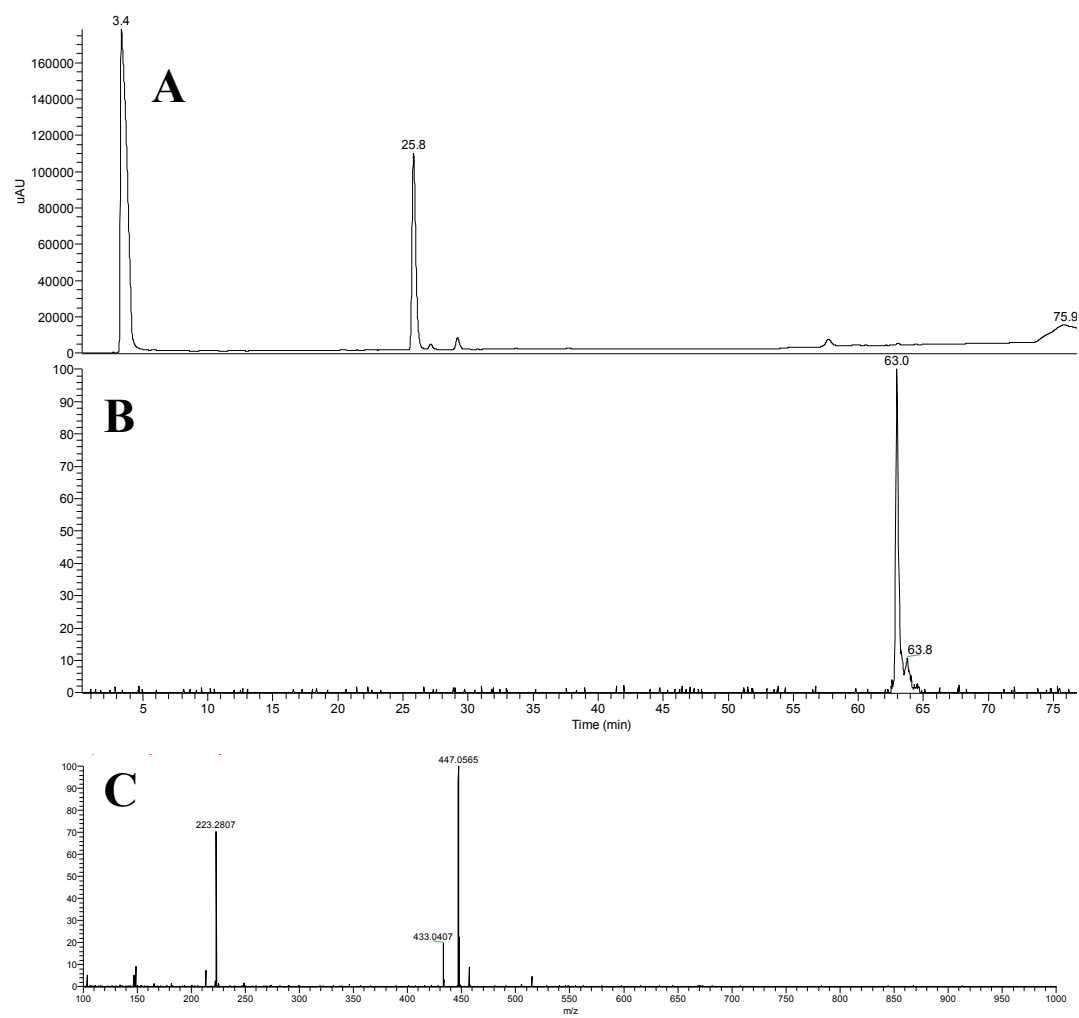

**Figure S3:** Ellagic acid rhamnoside (A) UV-Vis chromatogram 210-500 nm total spectrum, (B) FT-MS chromatogram showing  $m/z$  447-448, and mass spectra.

RT: 0.1 - 80.0

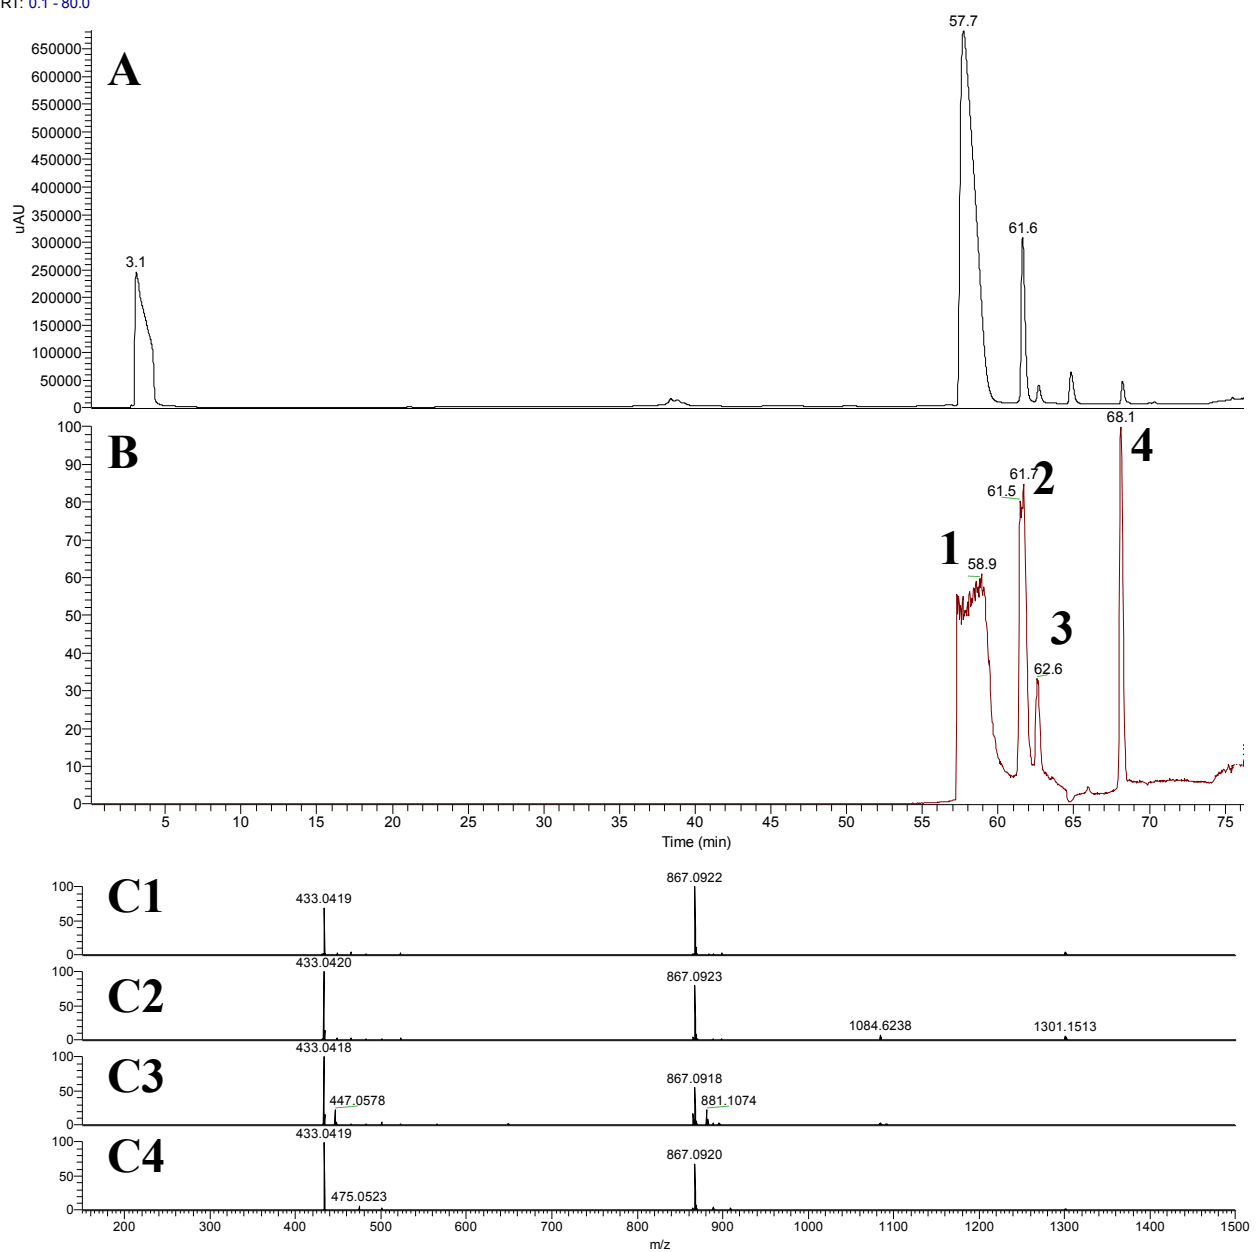

**Figure S4:** Ellagic acid xyloside (A) UV-Vis chromatogram, (B) FT-MS chromatogram showing  $m/z$  433-434, and (C) mass spectra of peaks 1, 2, 3, 4.

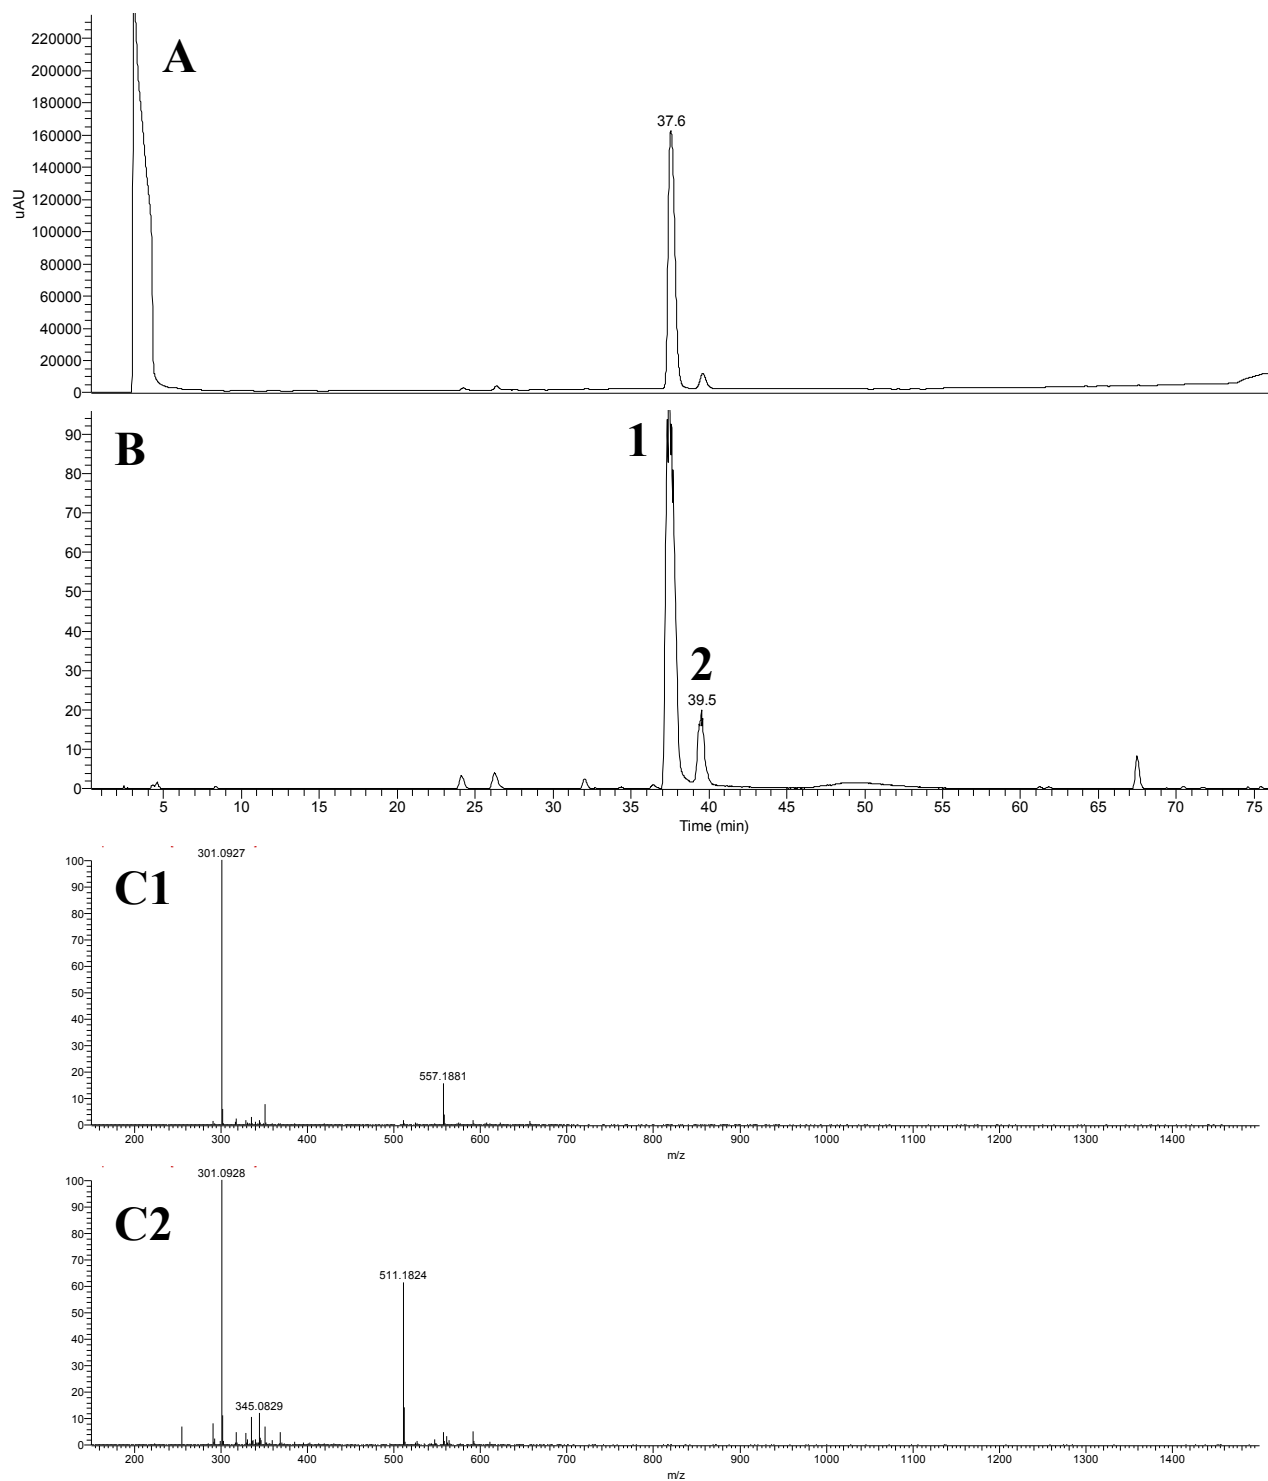

**Figure S5:** Phenyl glycoside (A) UV-Vis chromatogram 210-500 nm total spectrum, (B) base peak FT-MS chromatogram, (C1) mass spectra of peak at 37.3 min showing  $[M+\text{formate}-H]^-$  and  $[2M+\text{formate}-H]^-$  ions at  $m/z$  301.0927 and 557.1881, respectively, and (C2) mass spectra of peak at 39.5 min showing  $[M+\text{formate}-H]^-$  at  $m/z$  301.0928 and  $[2M-H]^-$  at  $m/z$  511.1824.

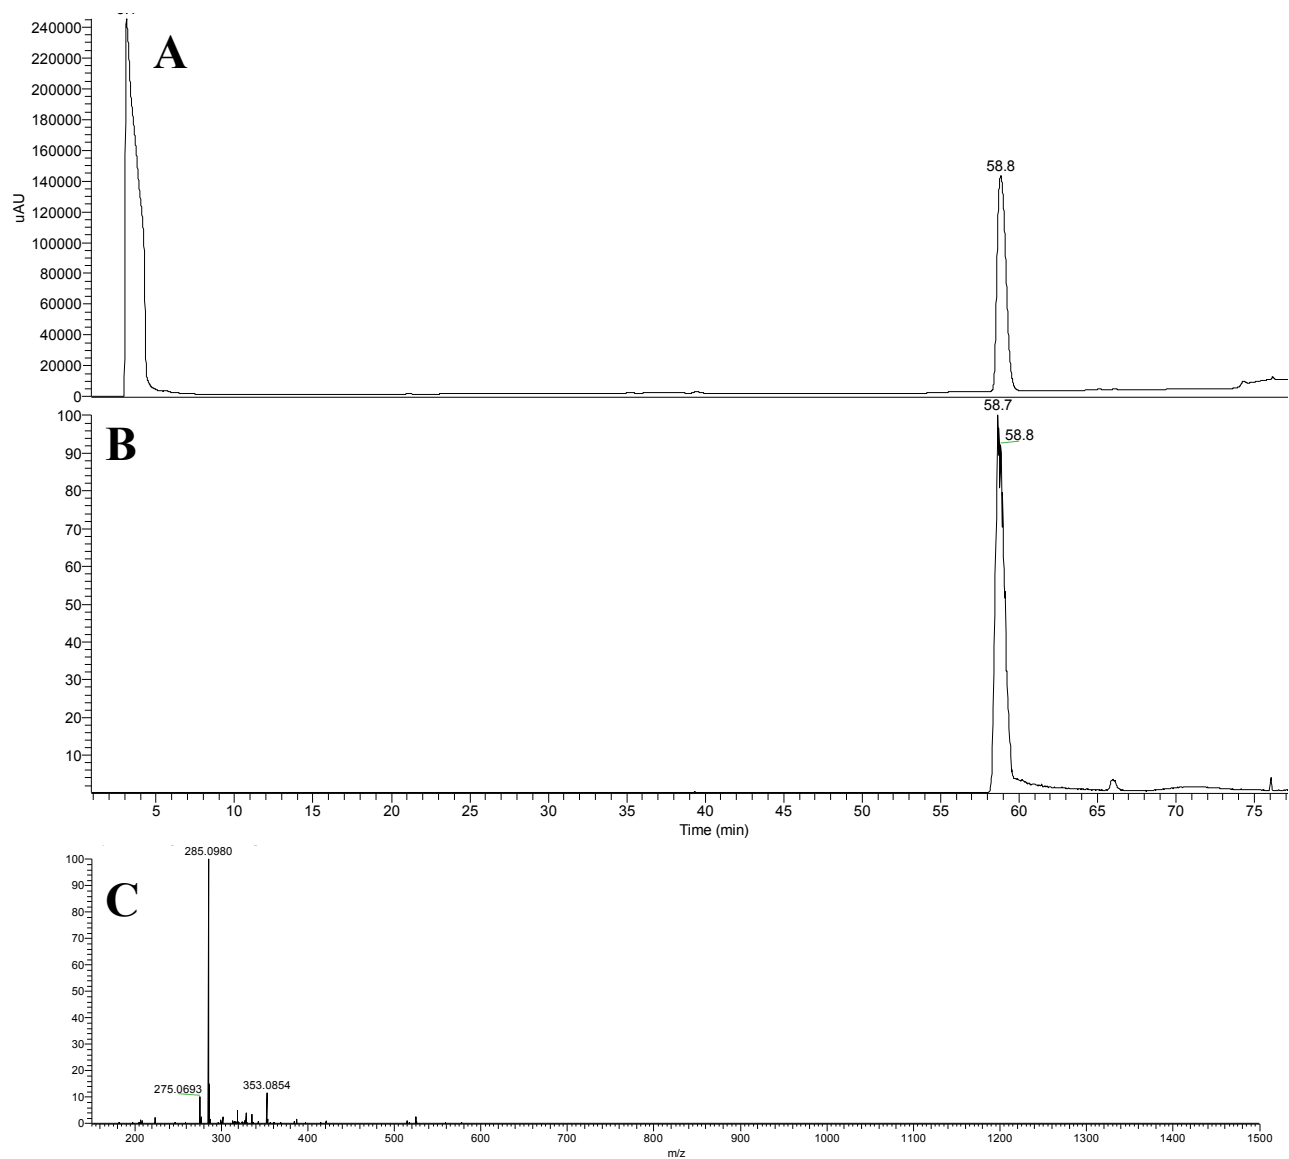

**Figure S6:** Phenyl rhamnoside (A) UV-Vis chromatogram 210-500 nm total spectrum, (B) base peak FT-MS chromatogram, and (C) mass spectra of peak at 58.7 min showing,  $[M+\text{formate}-H]^-$  at  $m/z$  285.0980.

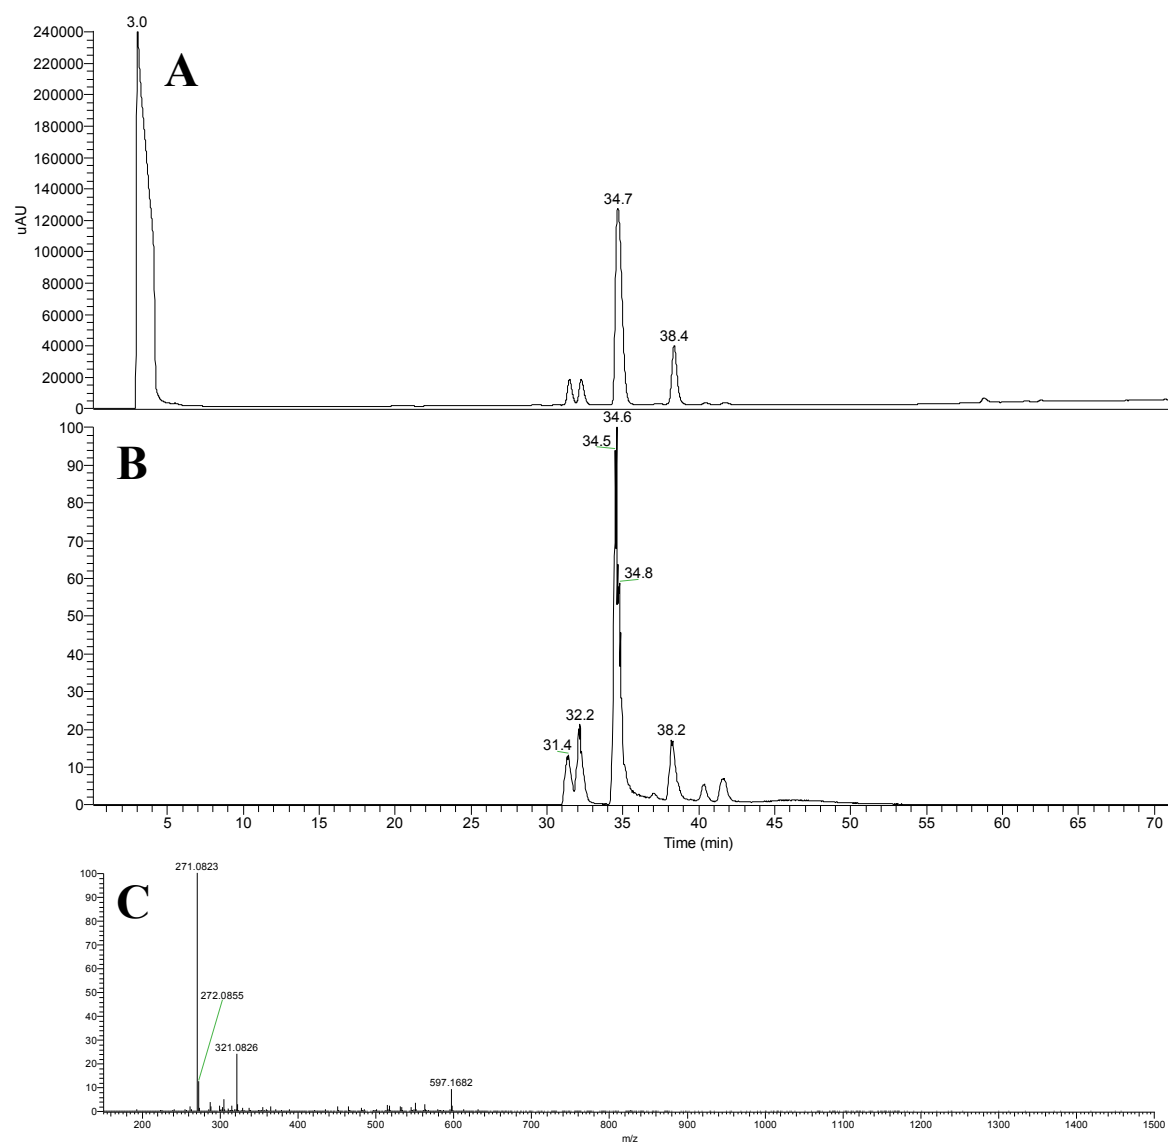

**Figure S7:** Phenyl xyloside (A) UV-Vis chromatogram 210-500 nm total spectrum, (B) base peak FT-MS chromatogram, and (C) mass spectra of peak at 34.6 min showing,  $[\text{M}+\text{formate}-\text{H}]^-$  at  $m/z$  271.0823.



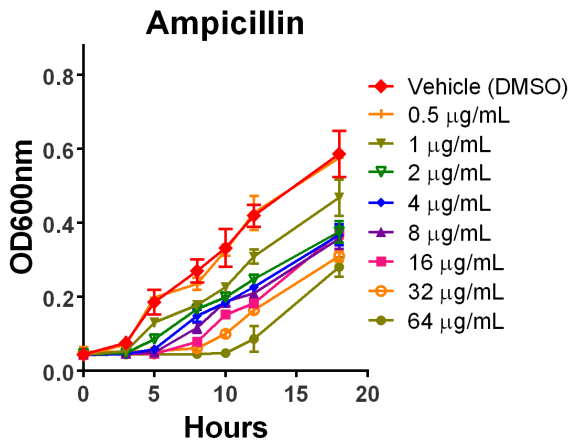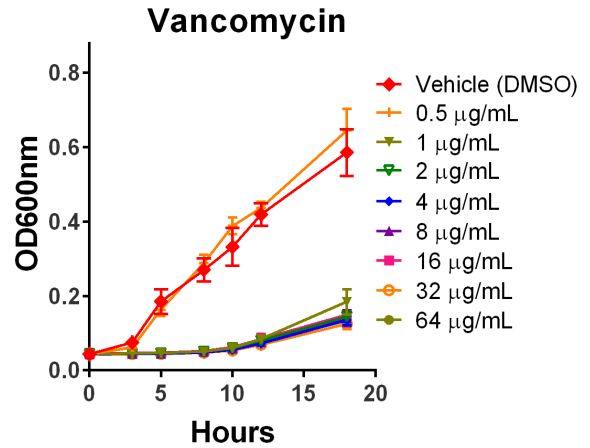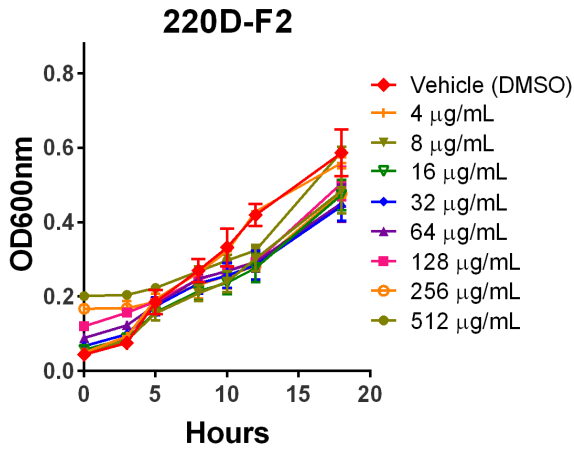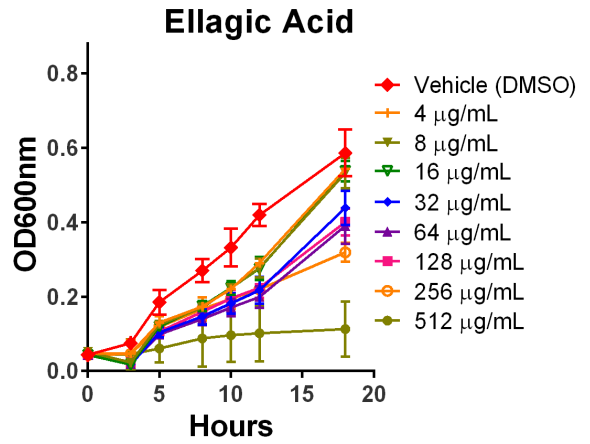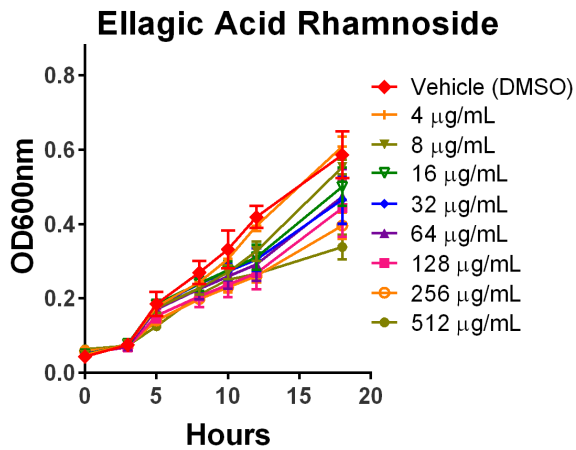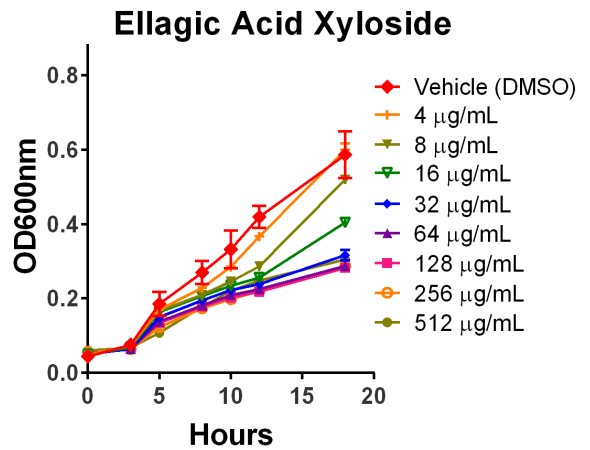

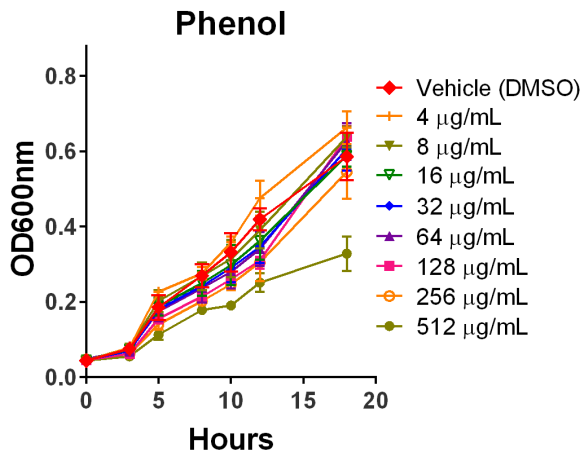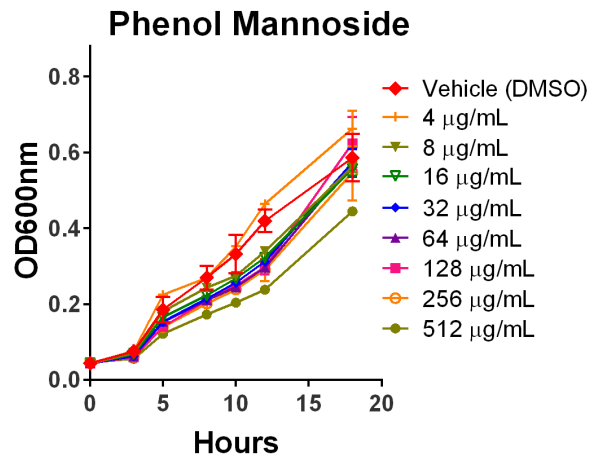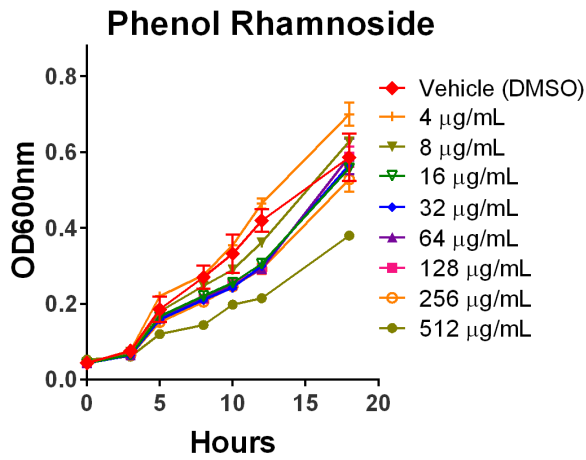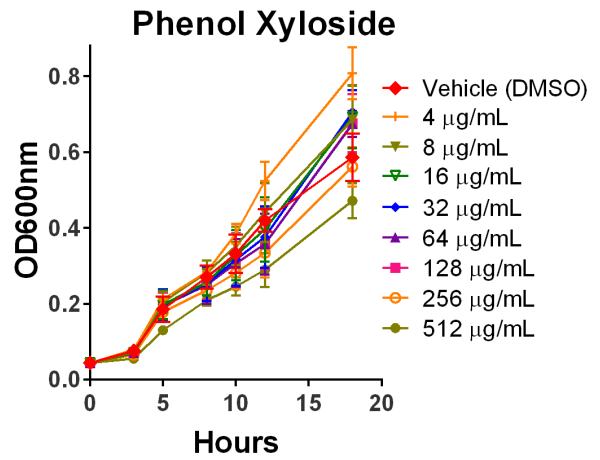

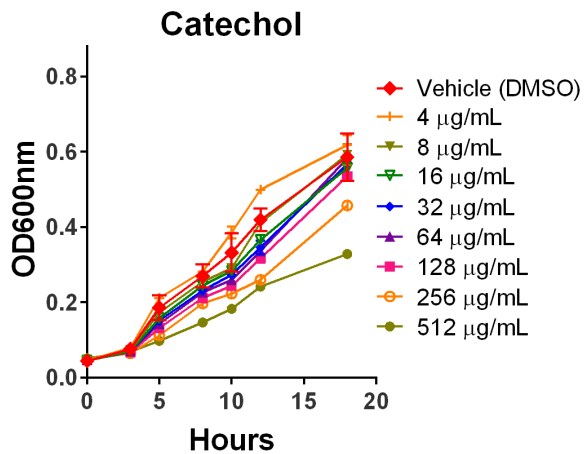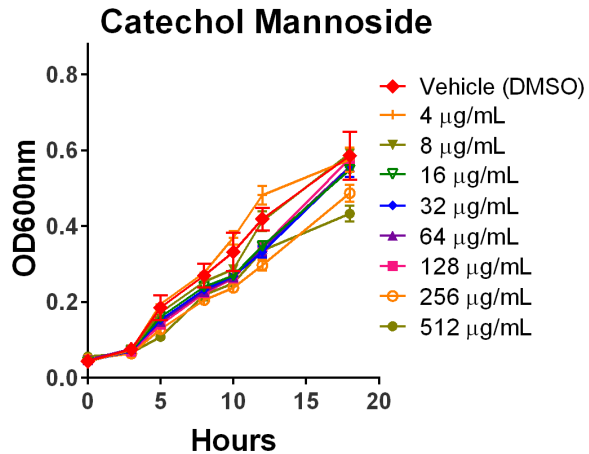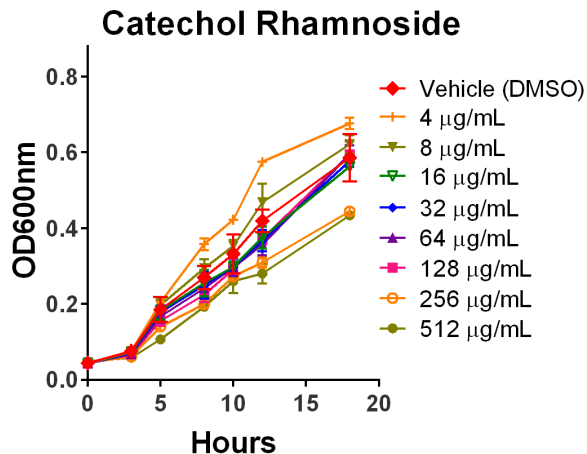

Figure S8: Growth curves for controls, 220D-F2 and synthesized analogs.

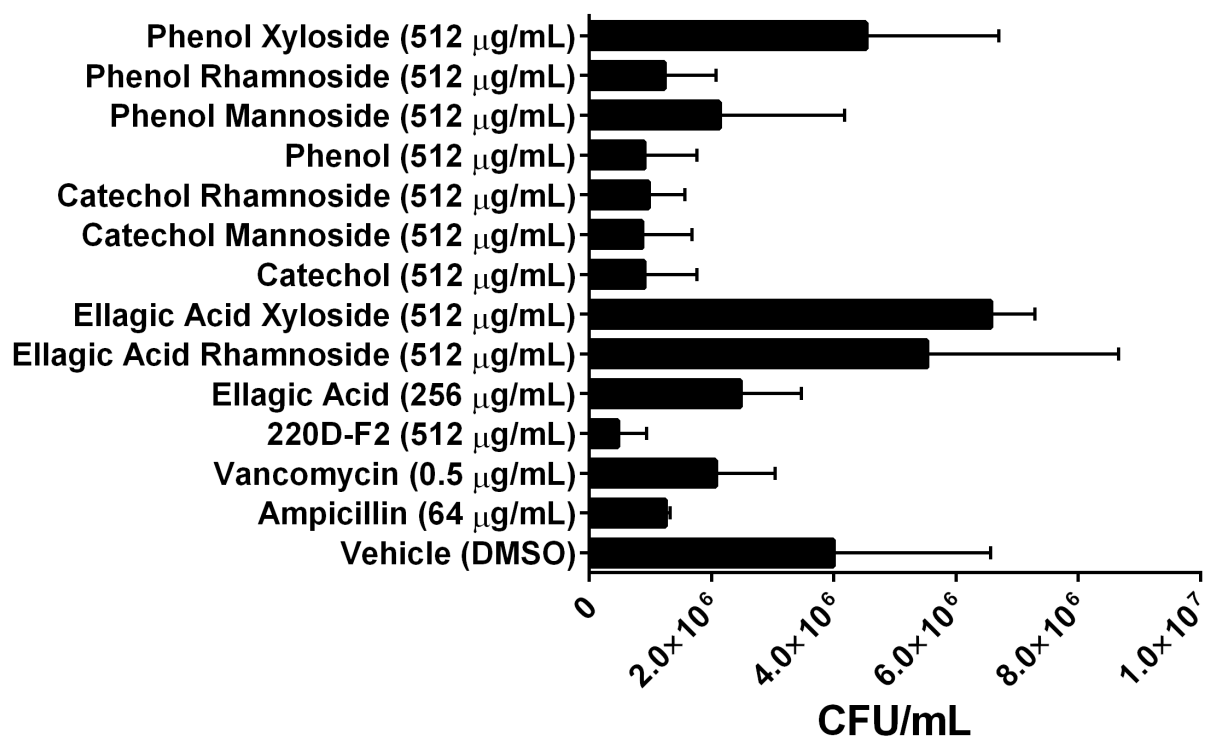

**Figure S9:** Total CFU/mL following 18 h incubation. None of the above represented concentrations exhibited a statistically significant ( $P < 0.05$ ) difference from the vehicle (DMSO) control.

# NMR Spectra

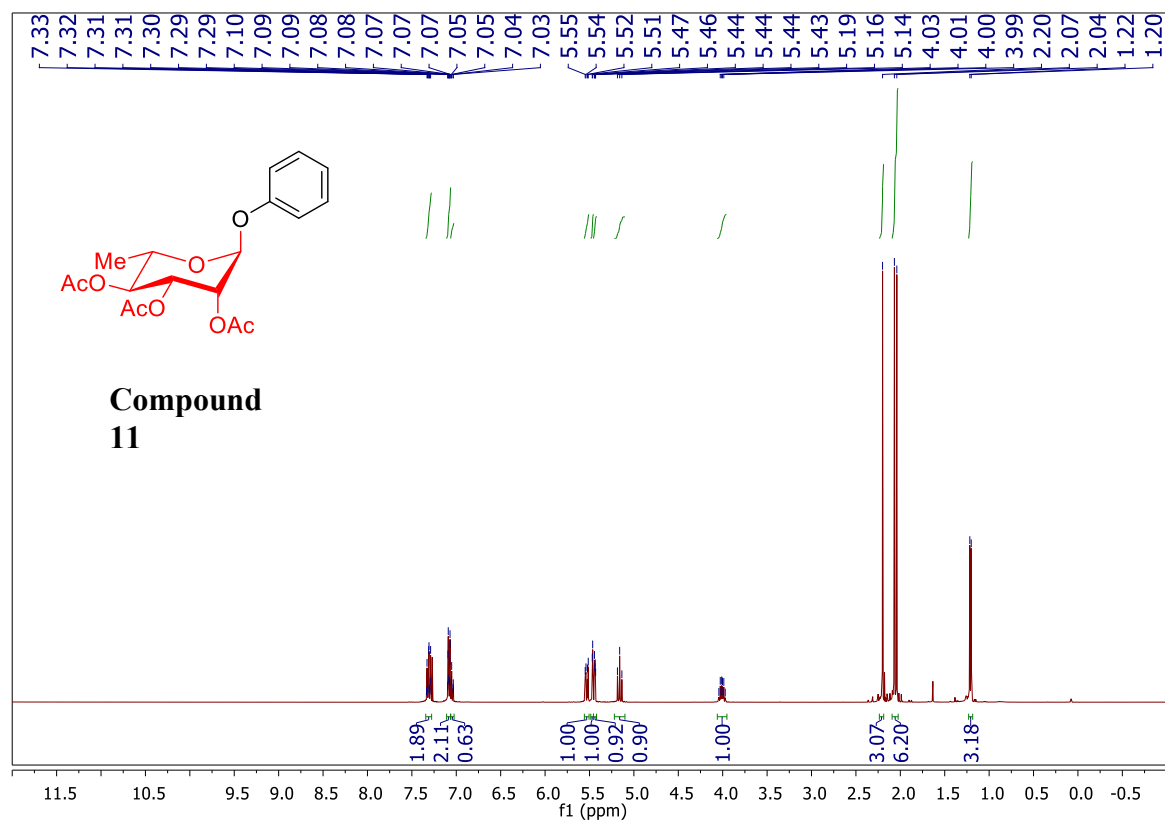

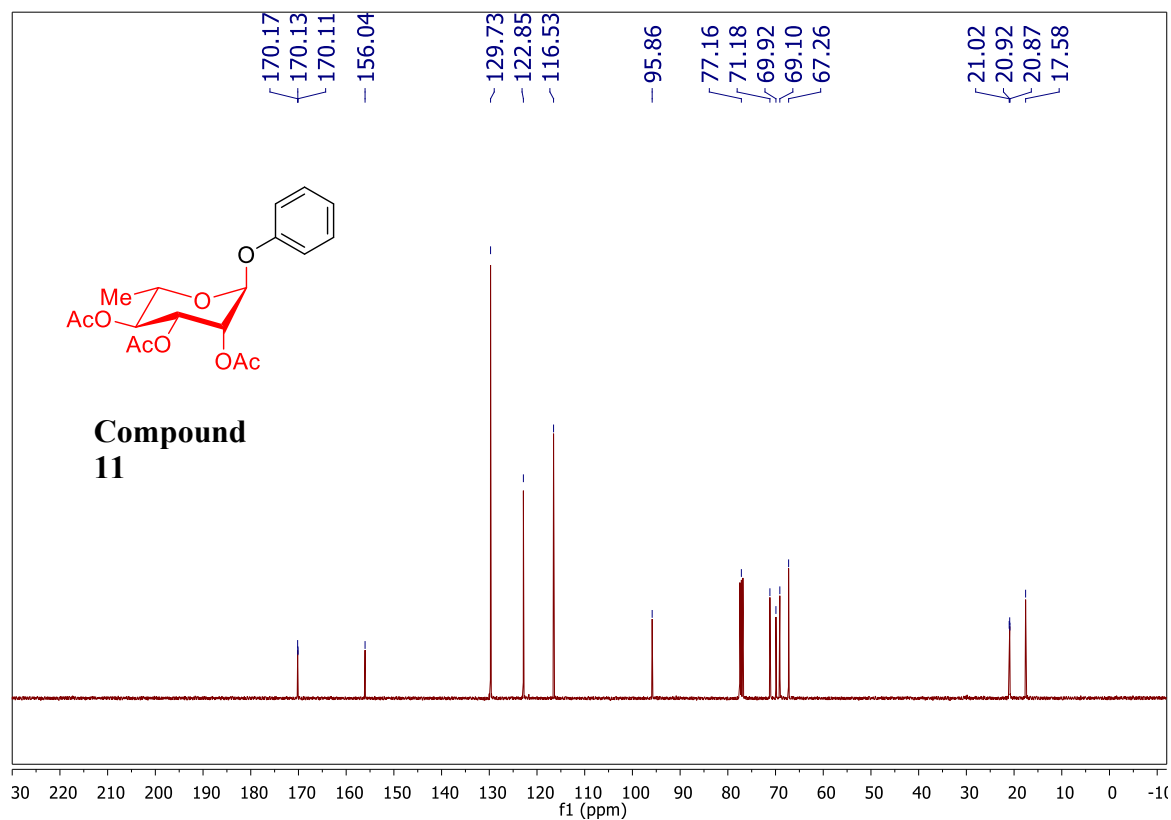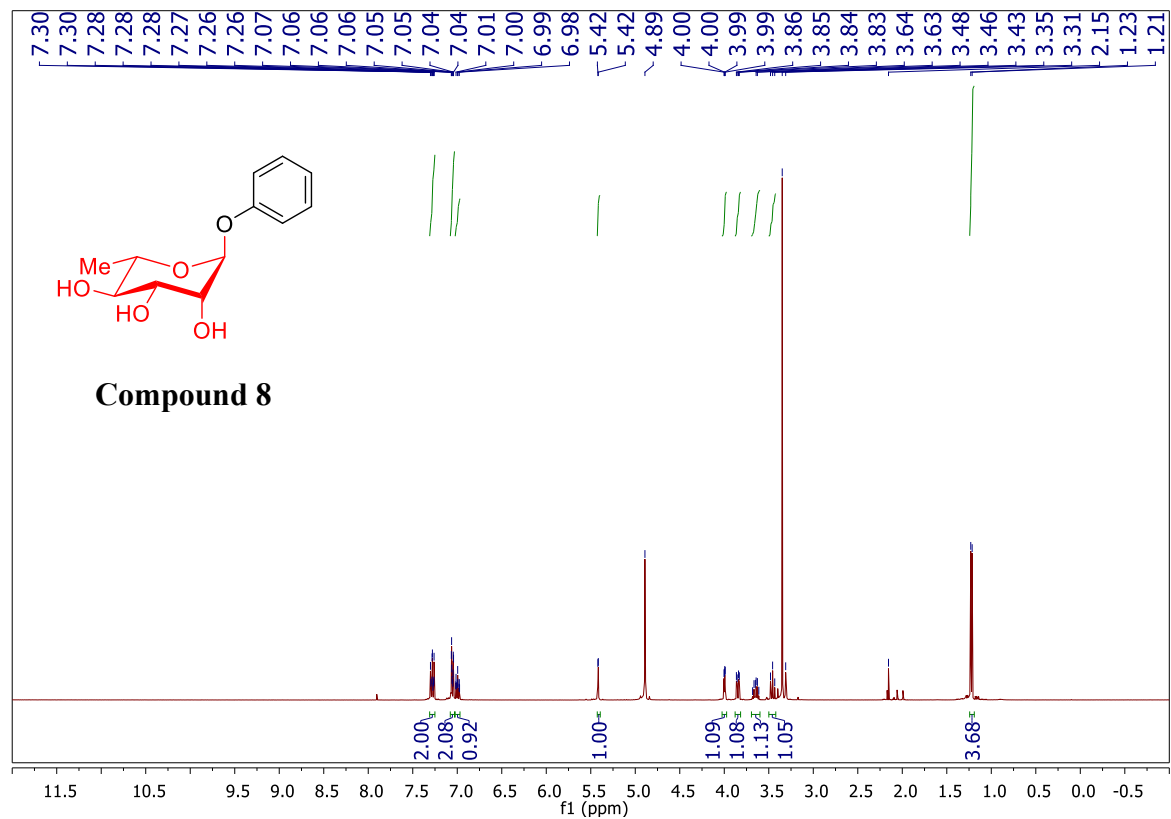

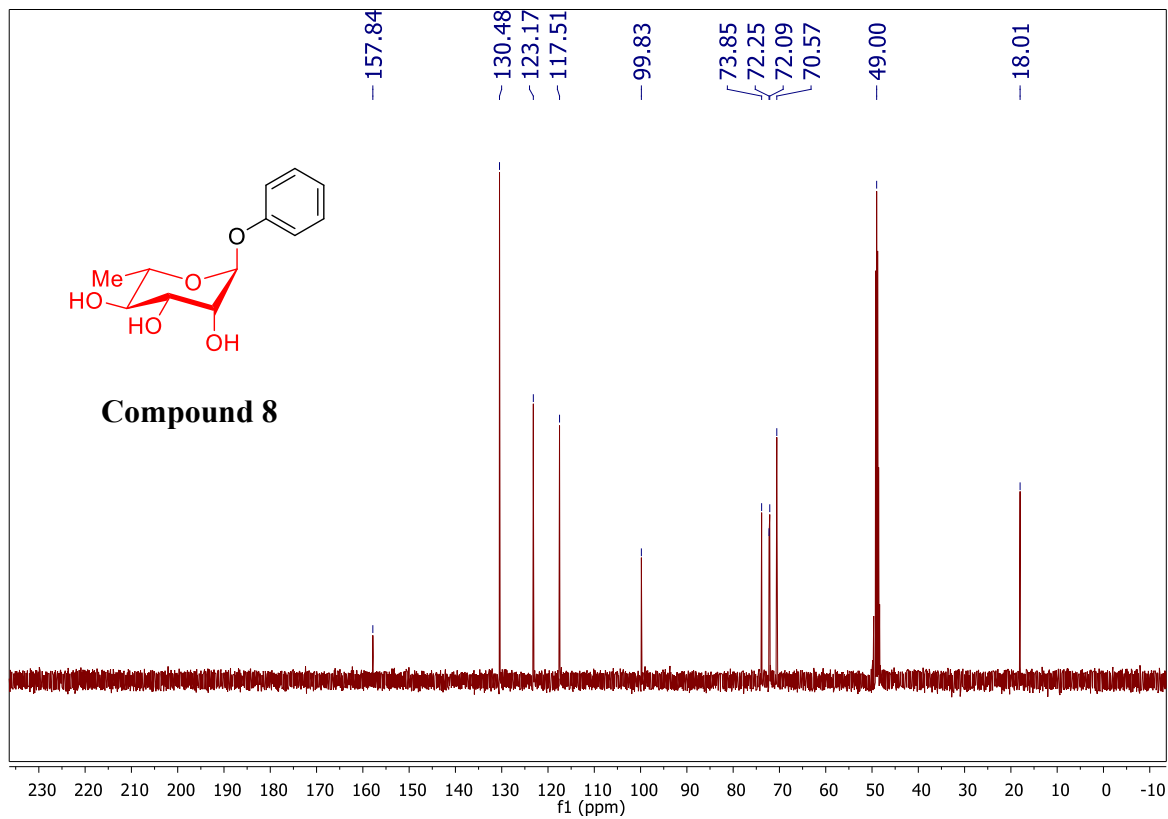

$^{13}\text{C}$ - $^1\text{H}$  coupled NMR (anomeric  $^1J_{\text{CH}} = 169.96$  Hz)

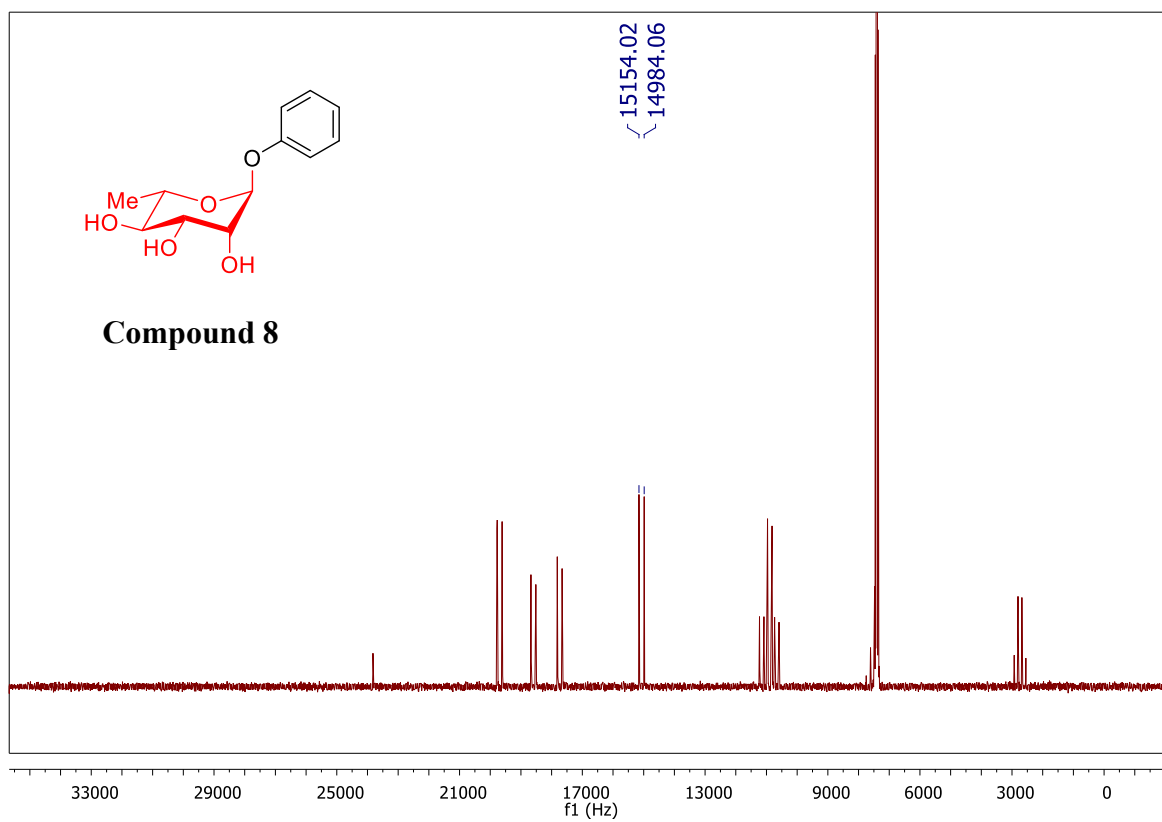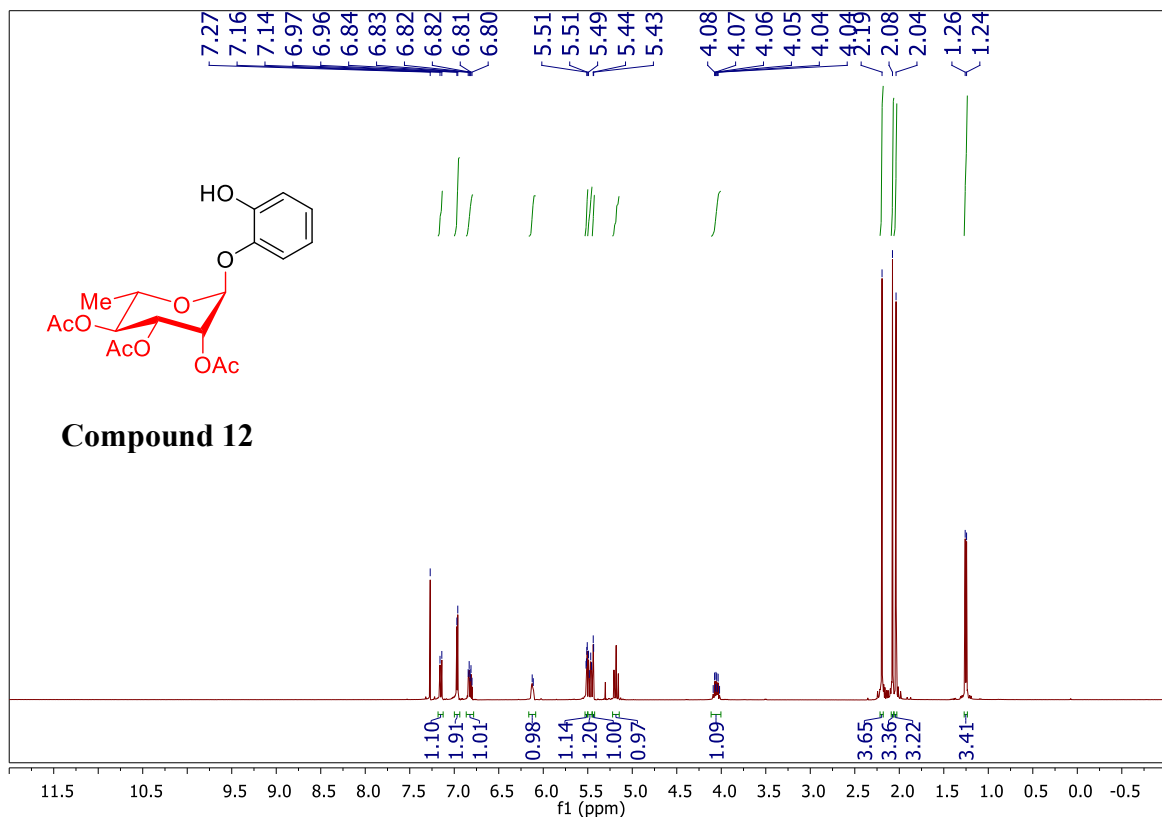



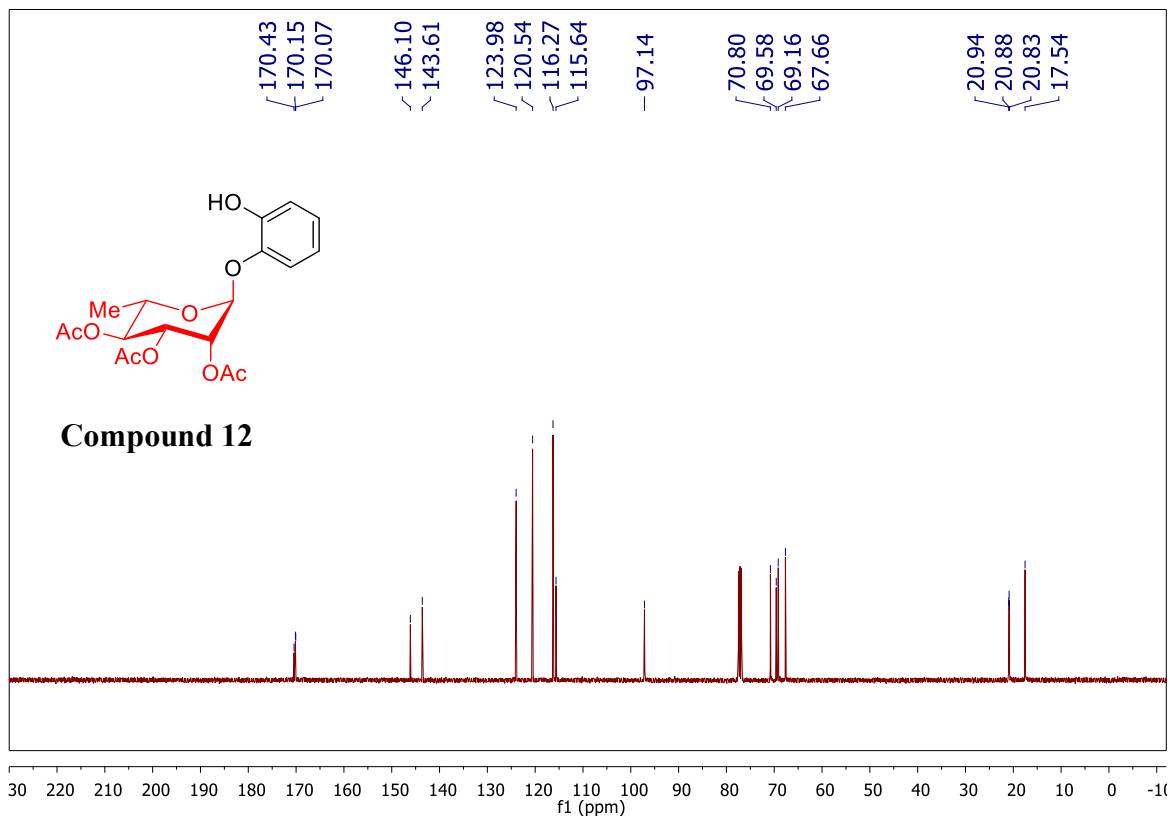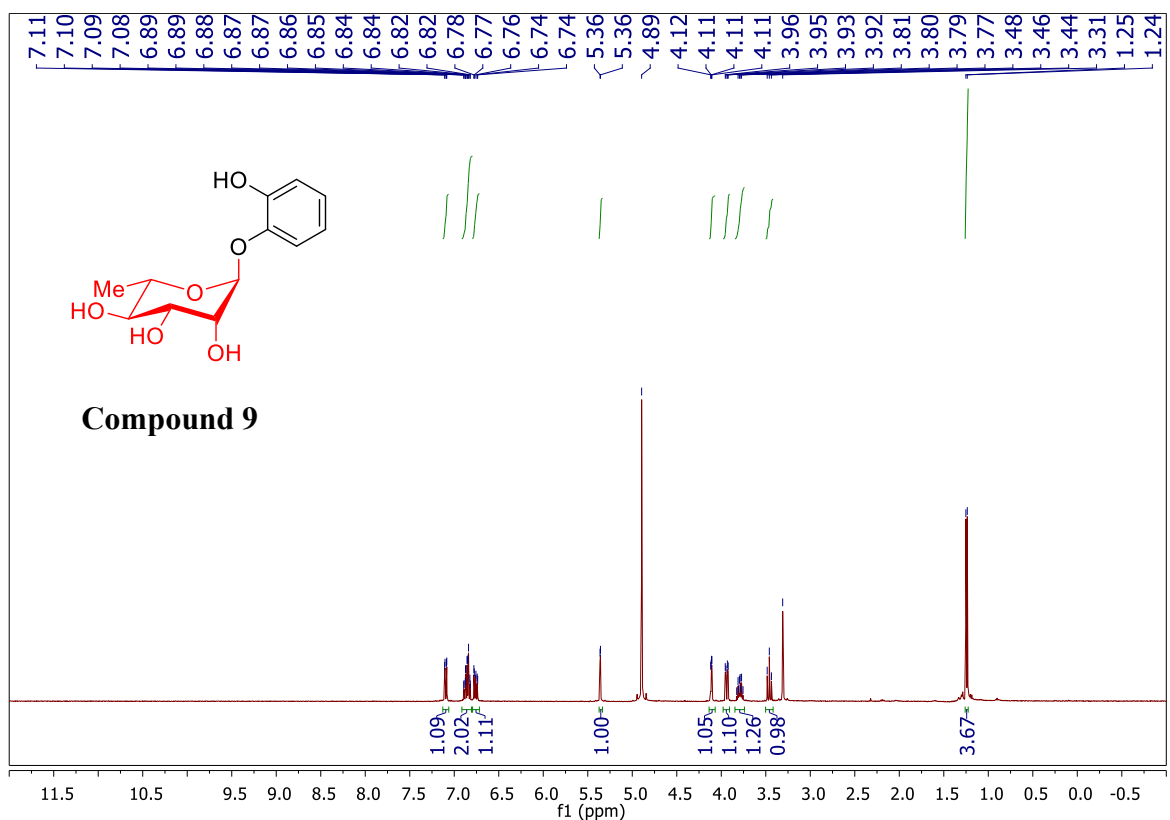

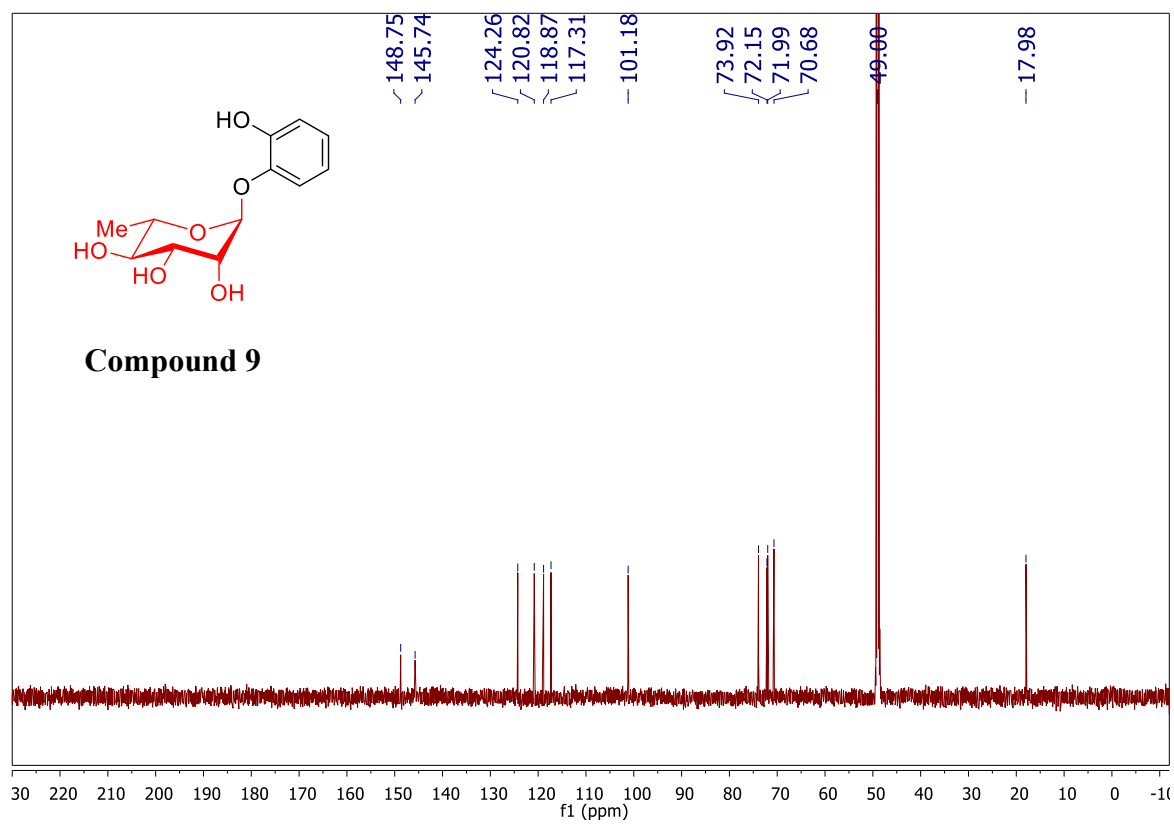

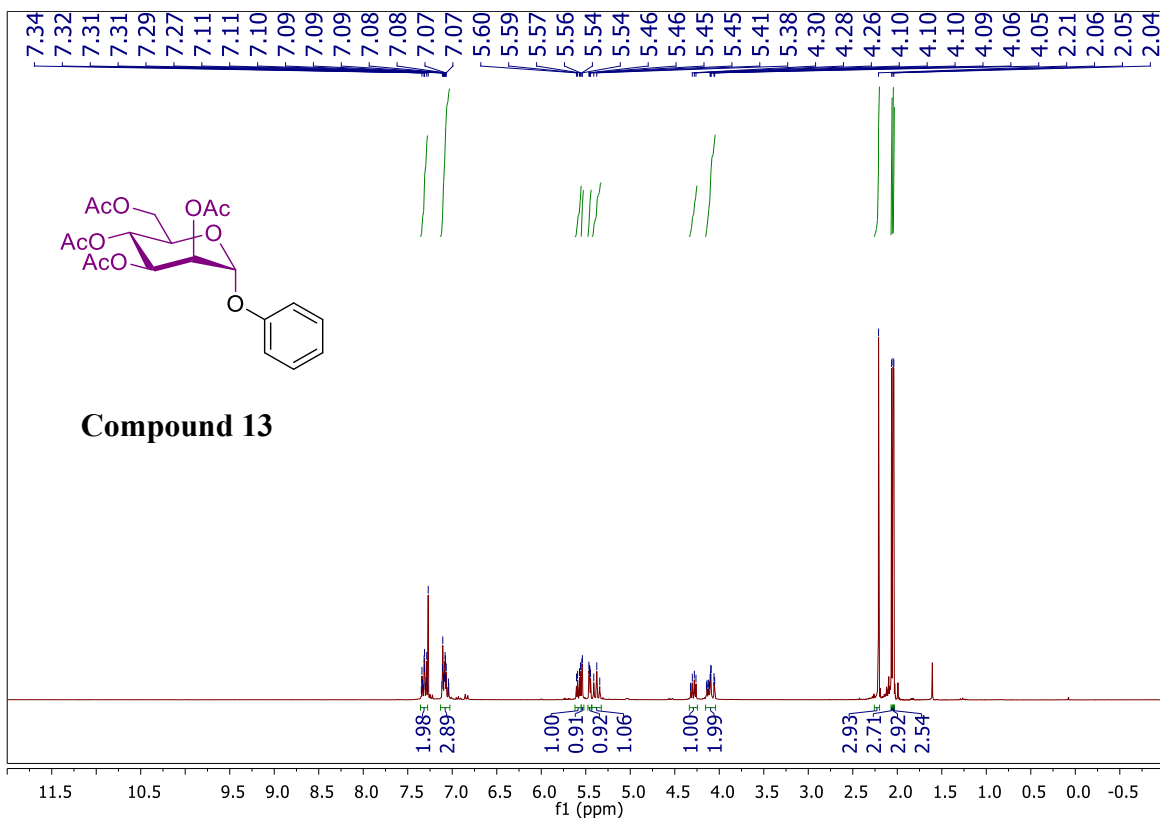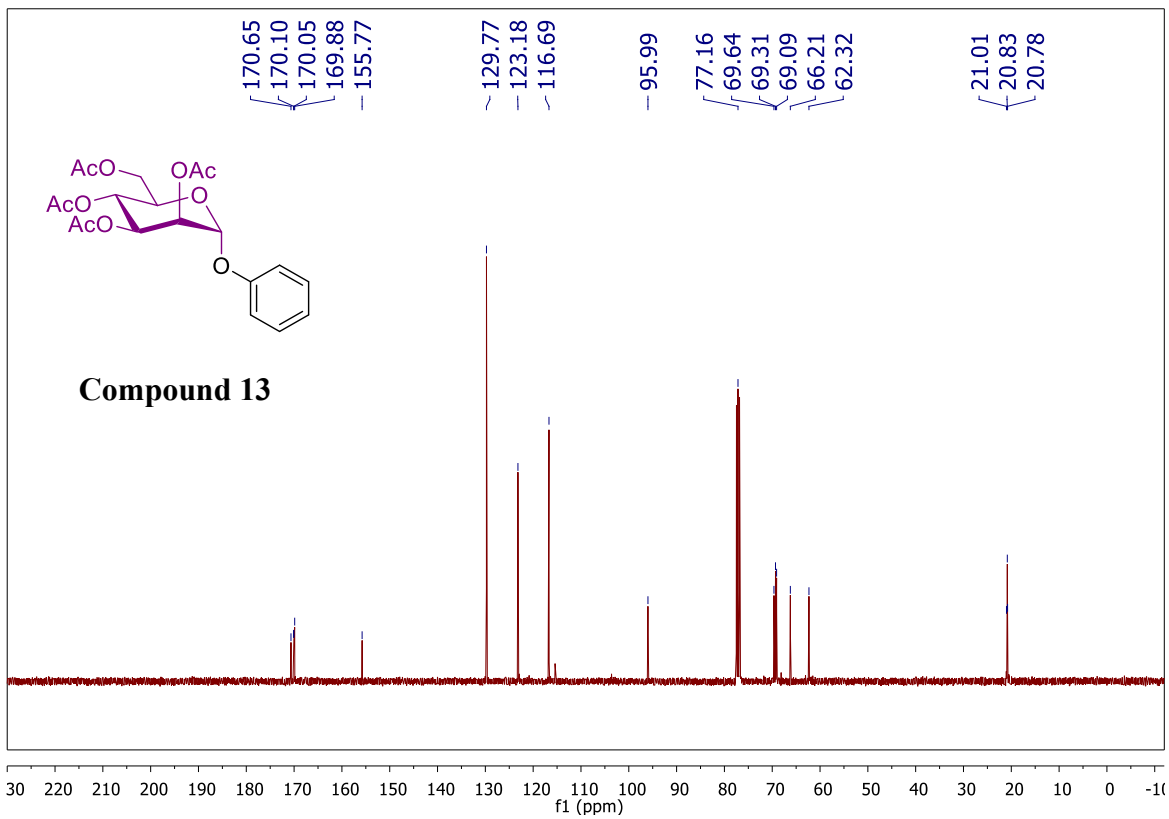

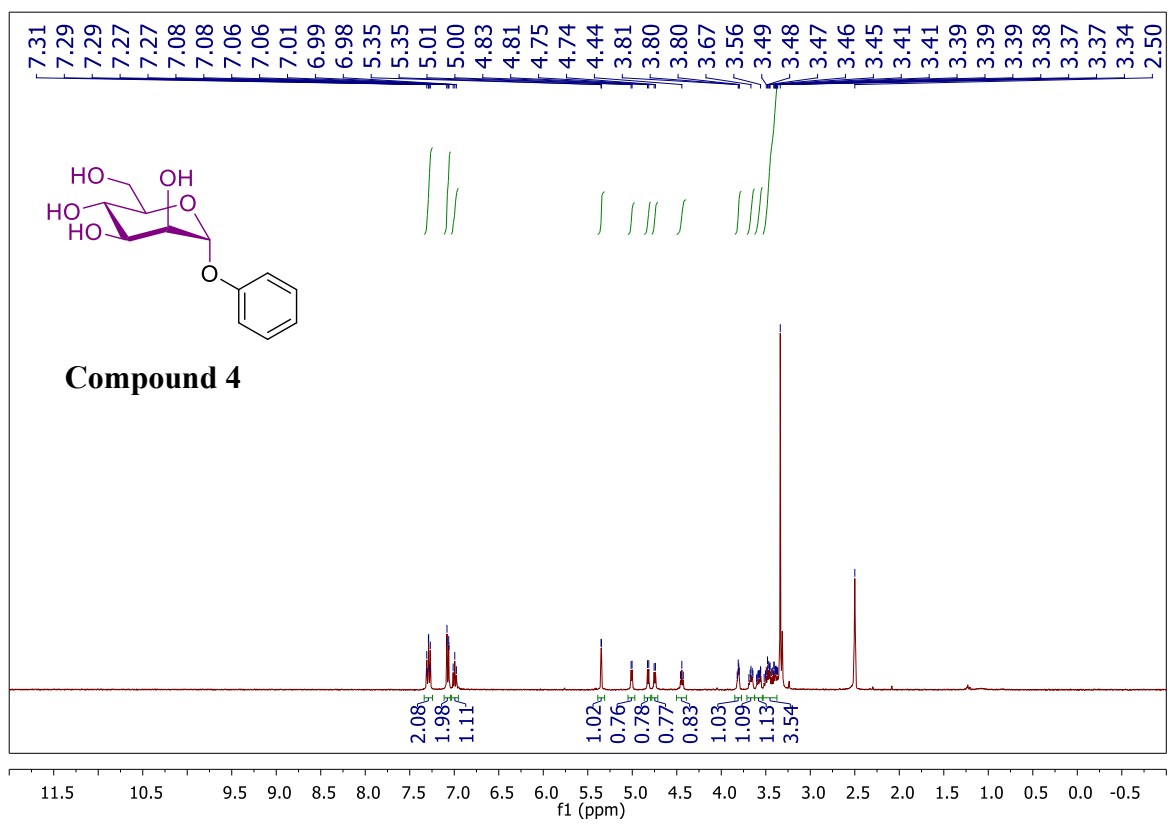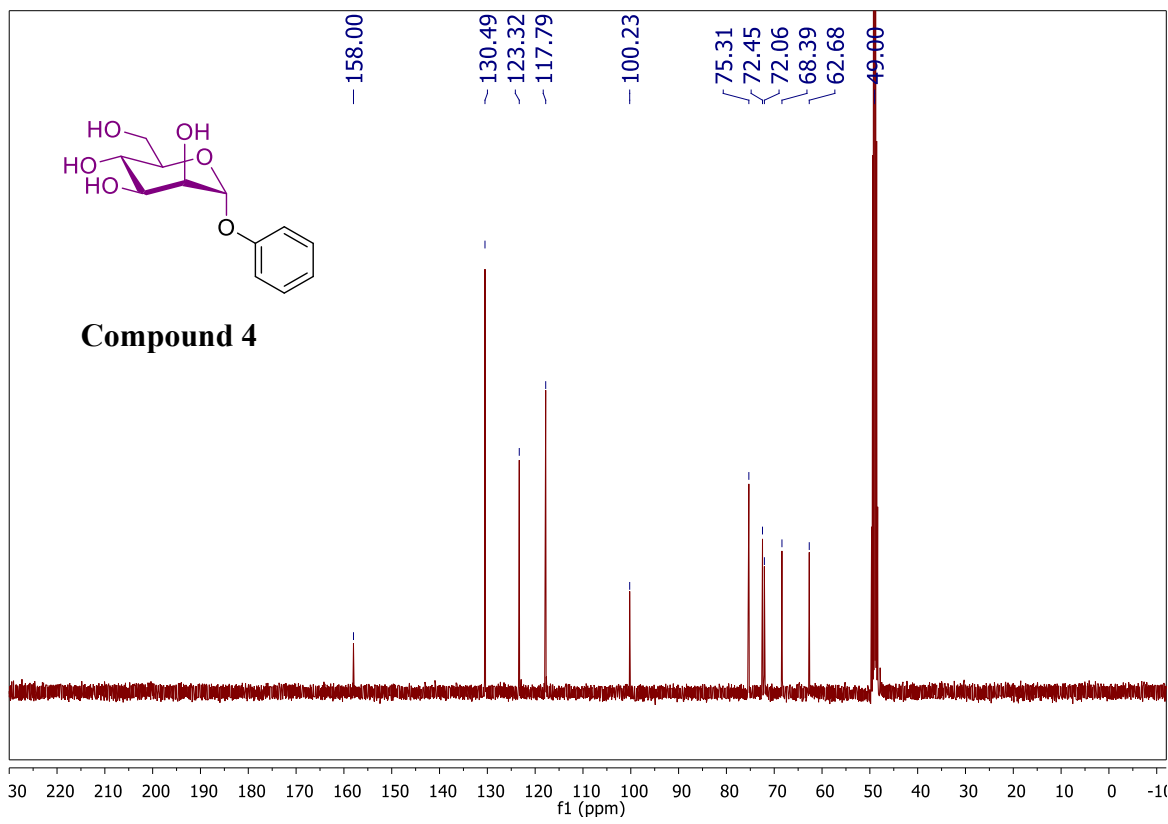

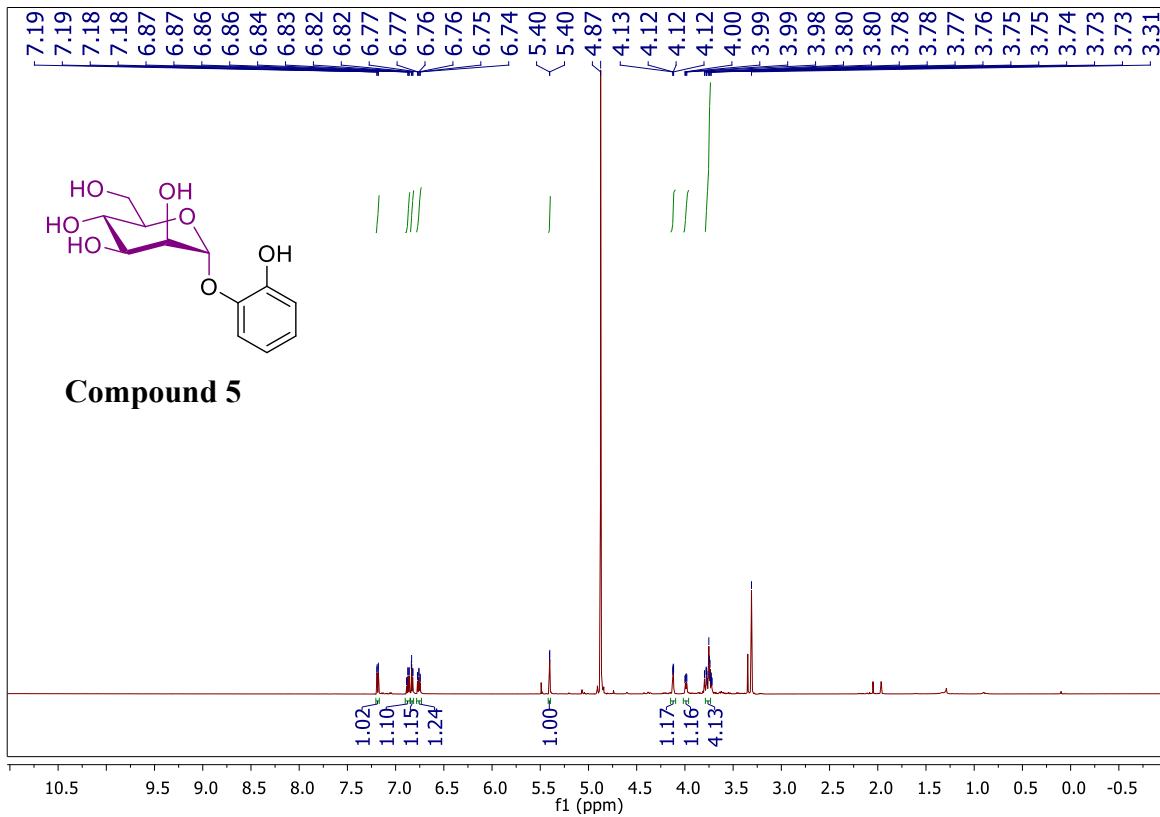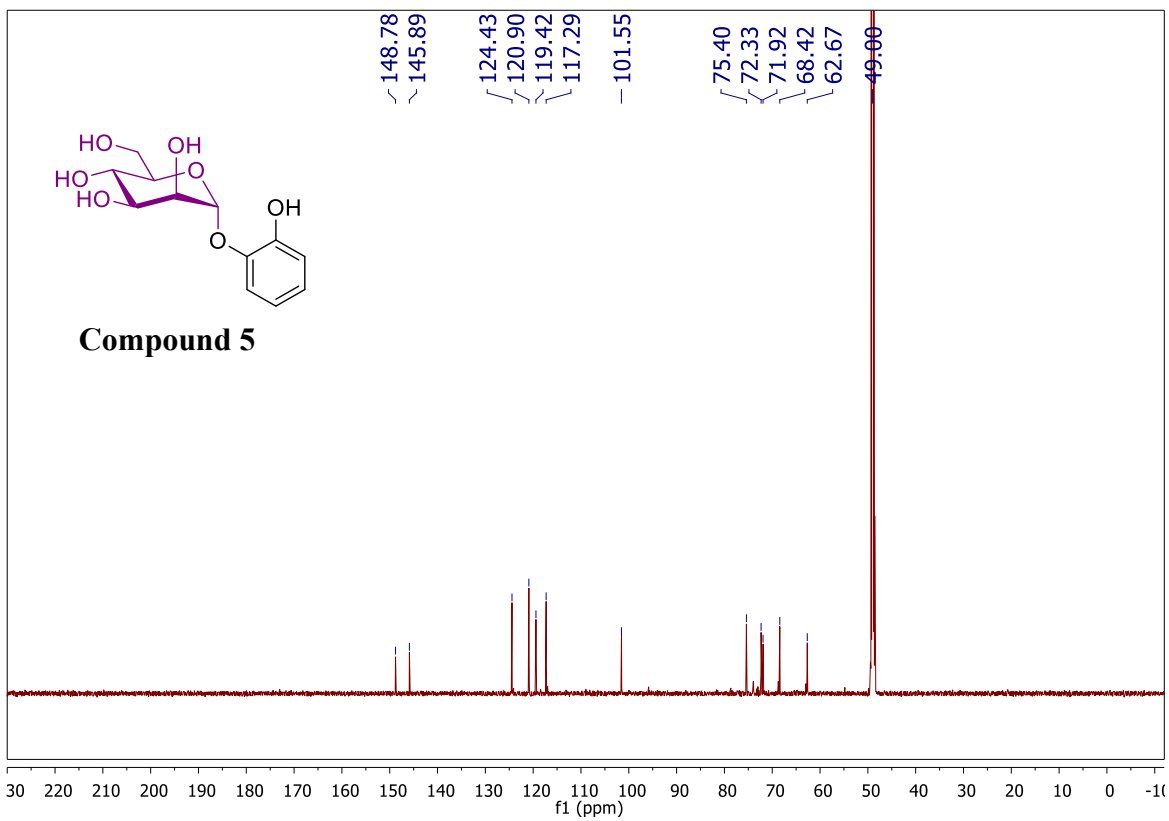

$^{13}\text{C}$ - $^1\text{H}$  coupled NMR (anomeric  $^1J_{\text{CH}} = 171.46 \text{ Hz}$ )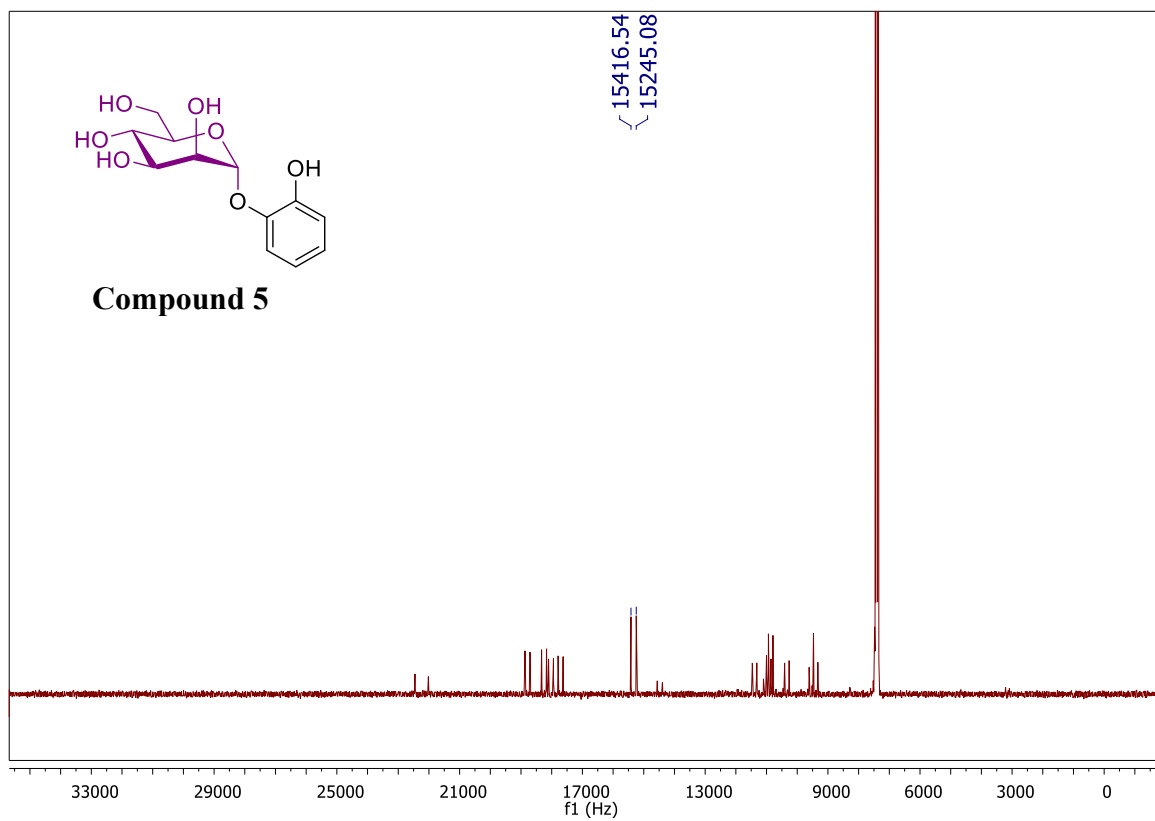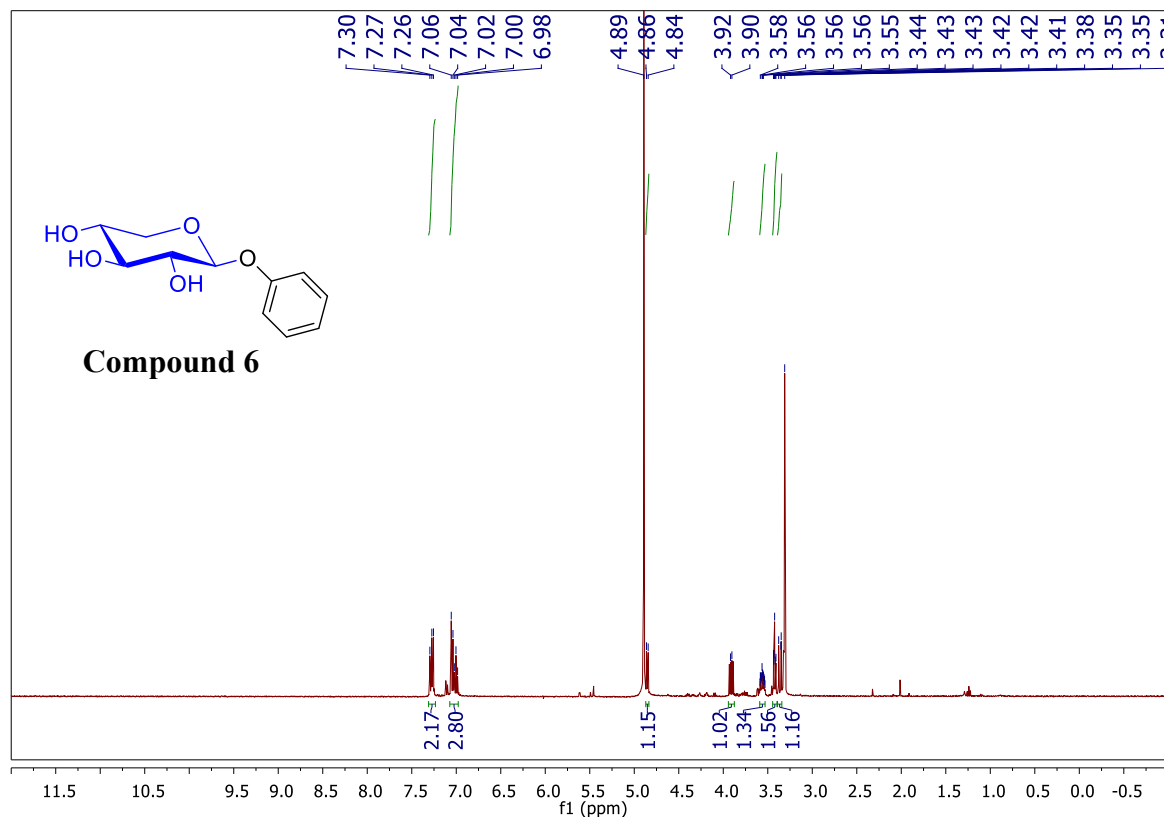







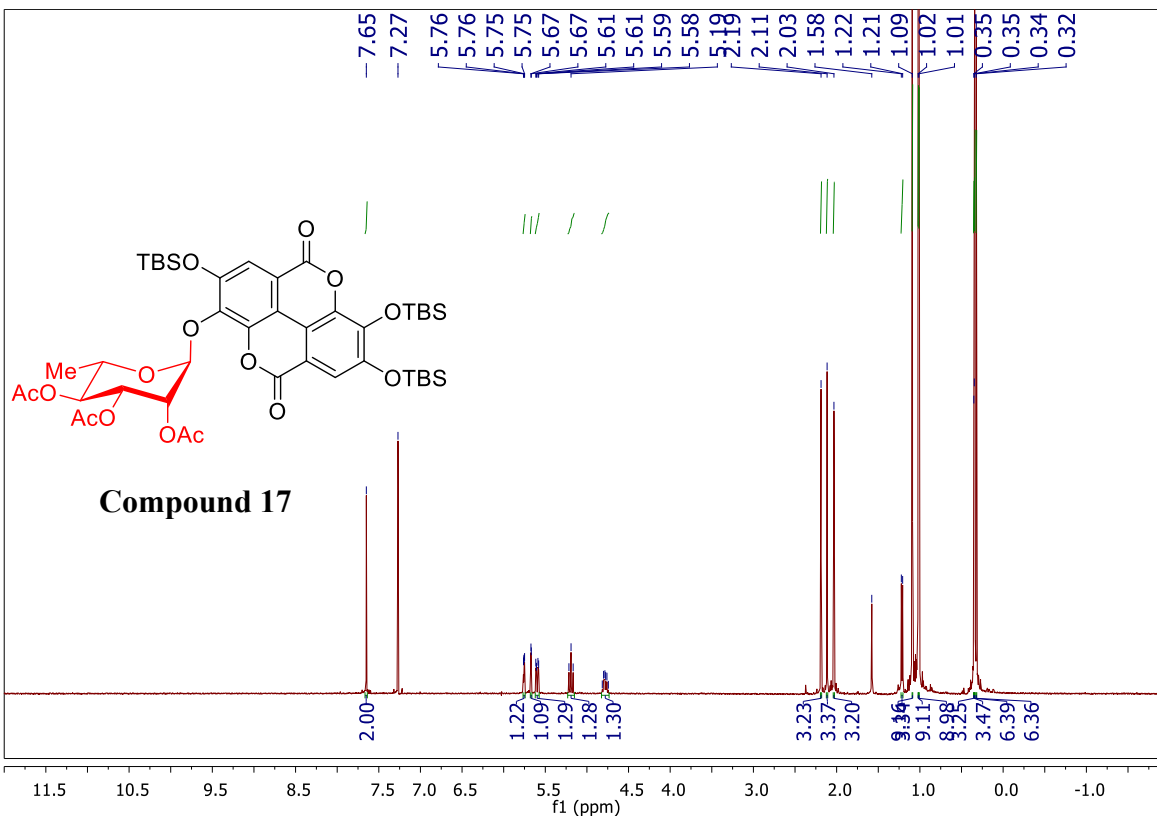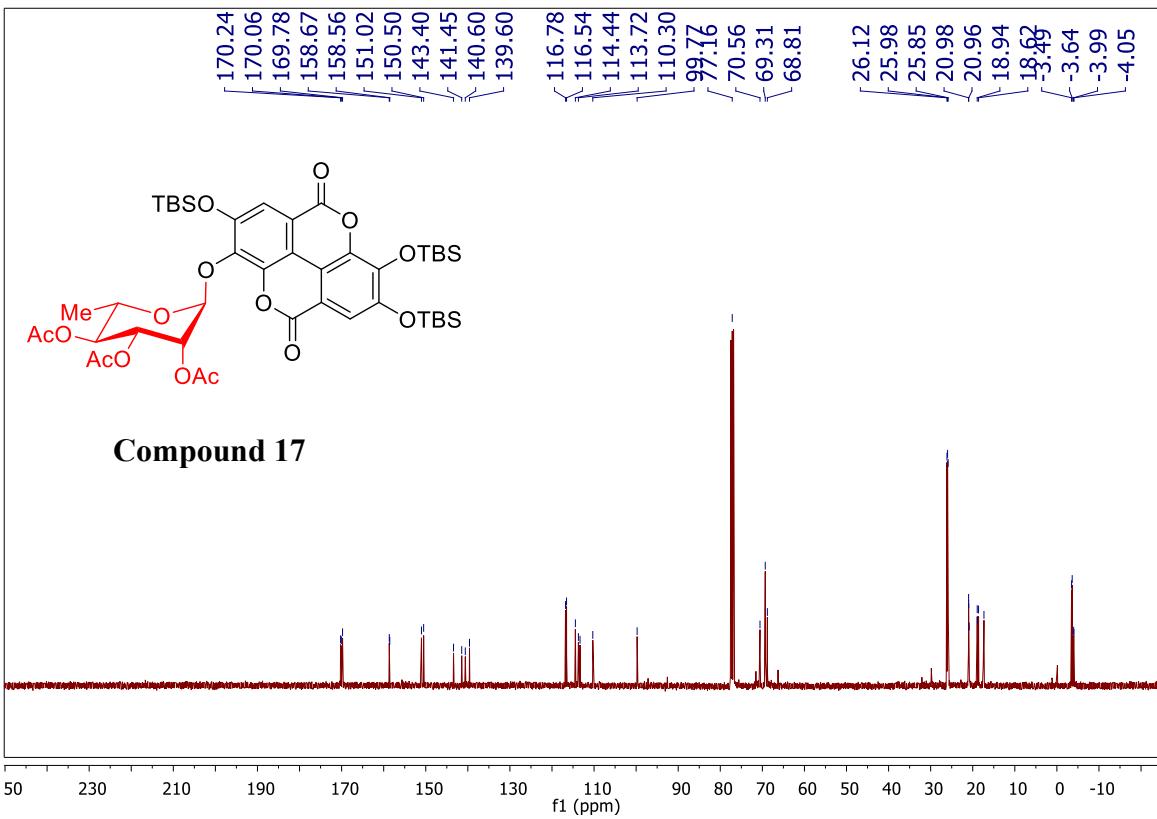

$^{13}\text{C}$ - $^1\text{H}$  coupled NMR (anomeric  $^1J_{\text{CH}} = 177.75 \text{ Hz}$ )

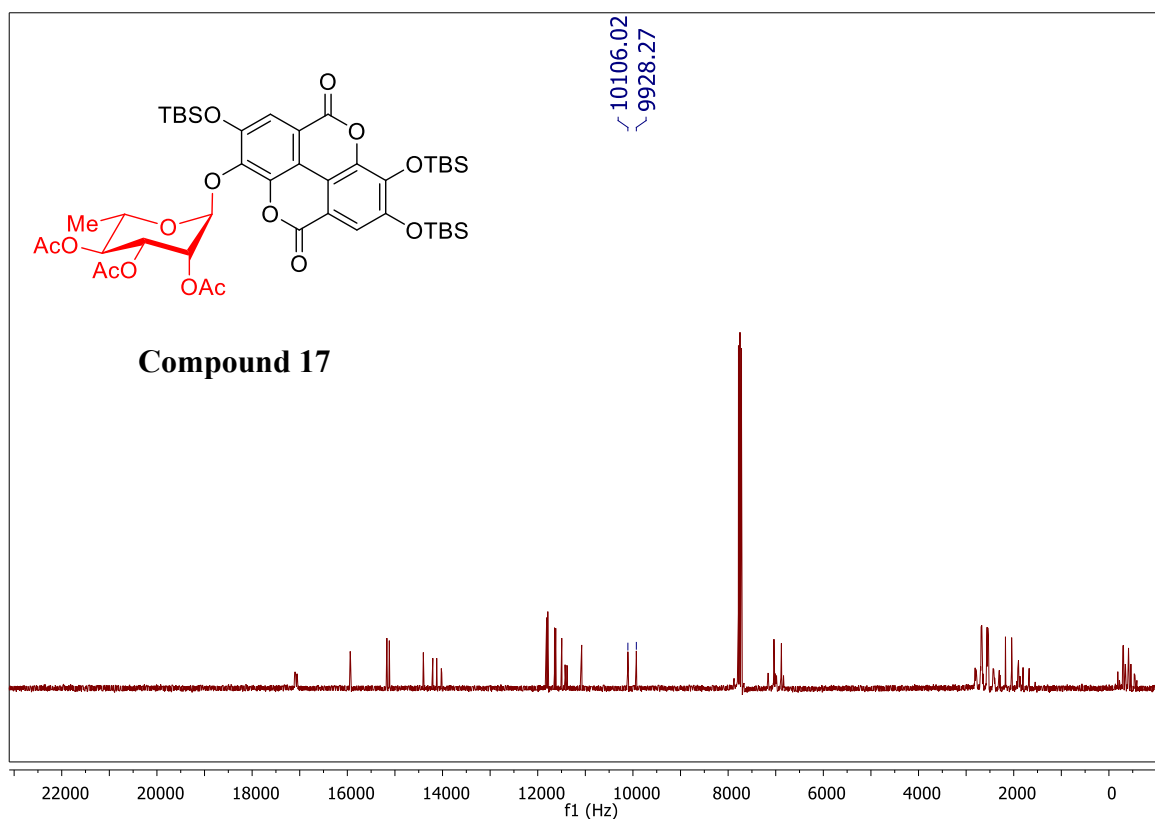

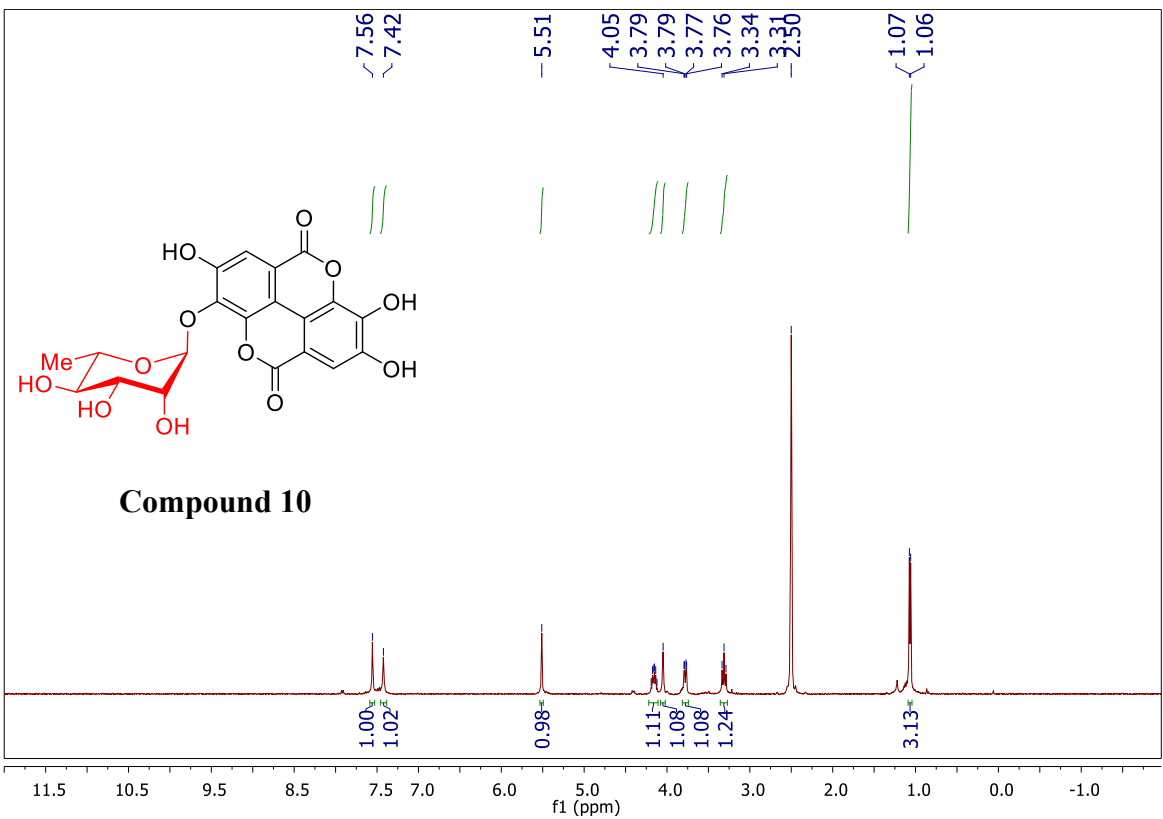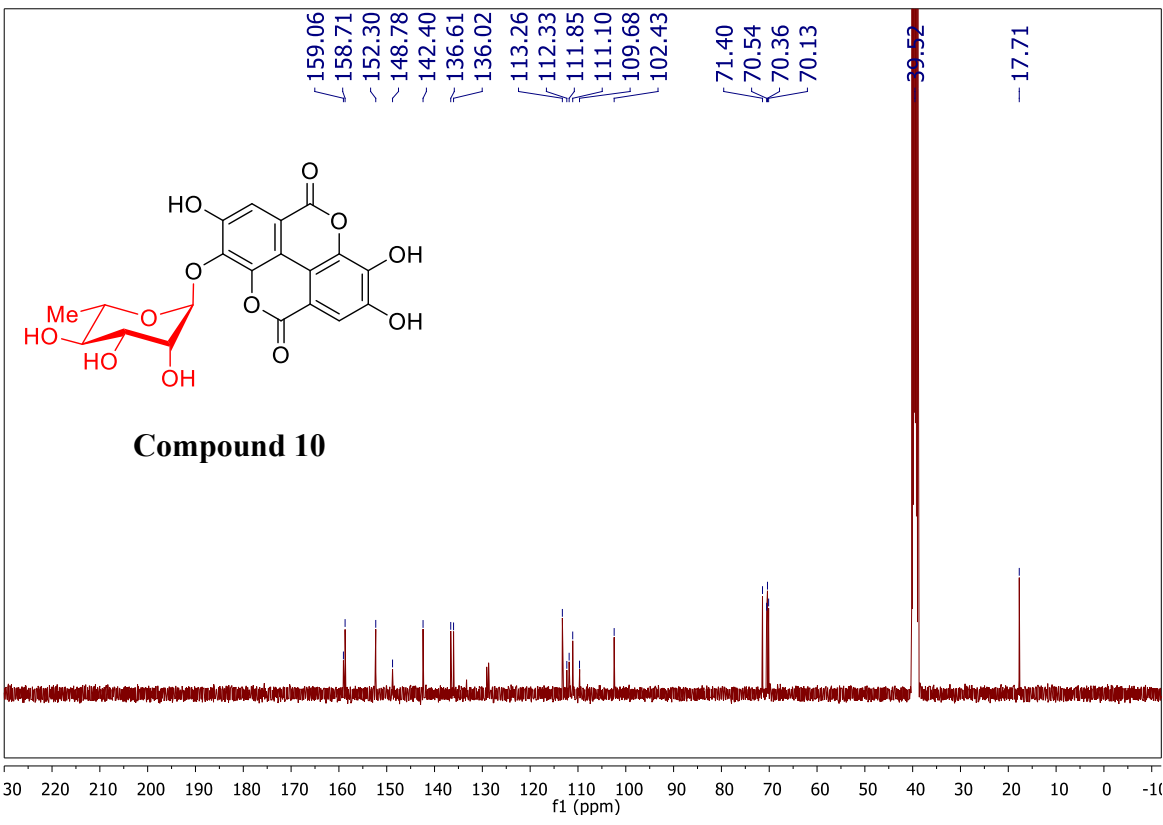

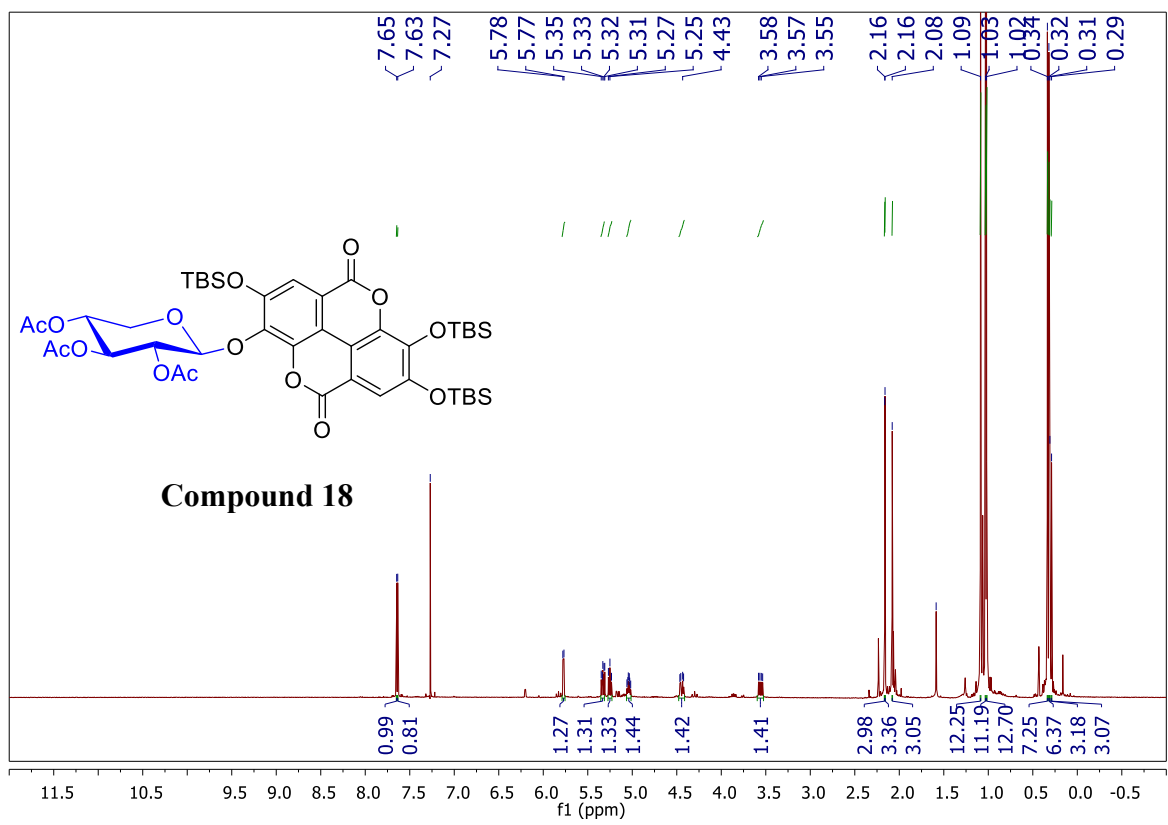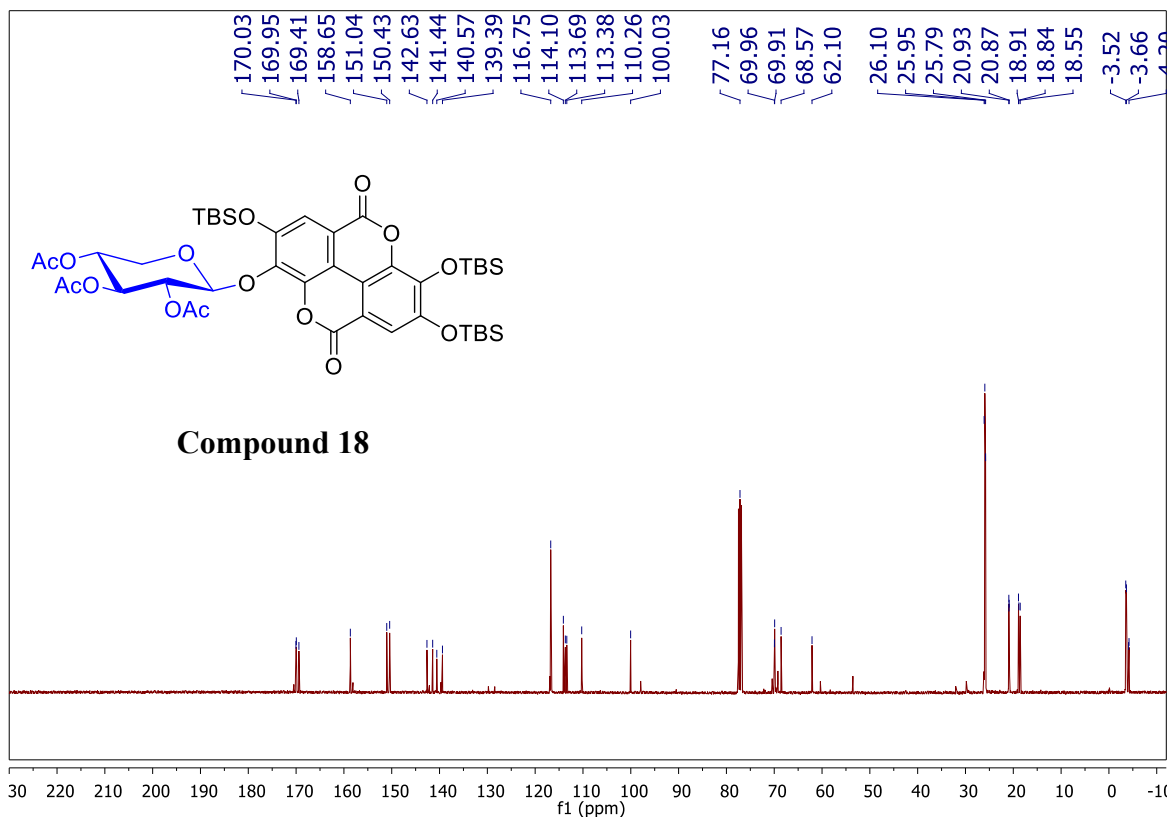

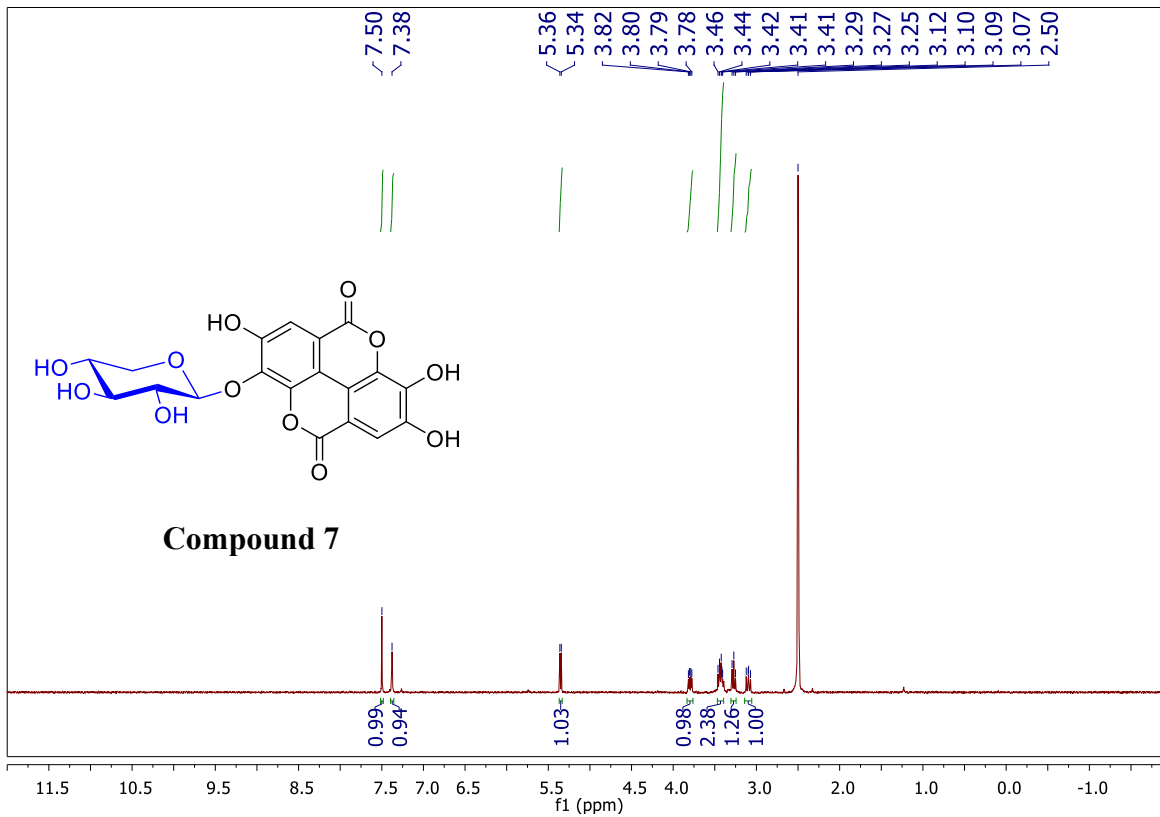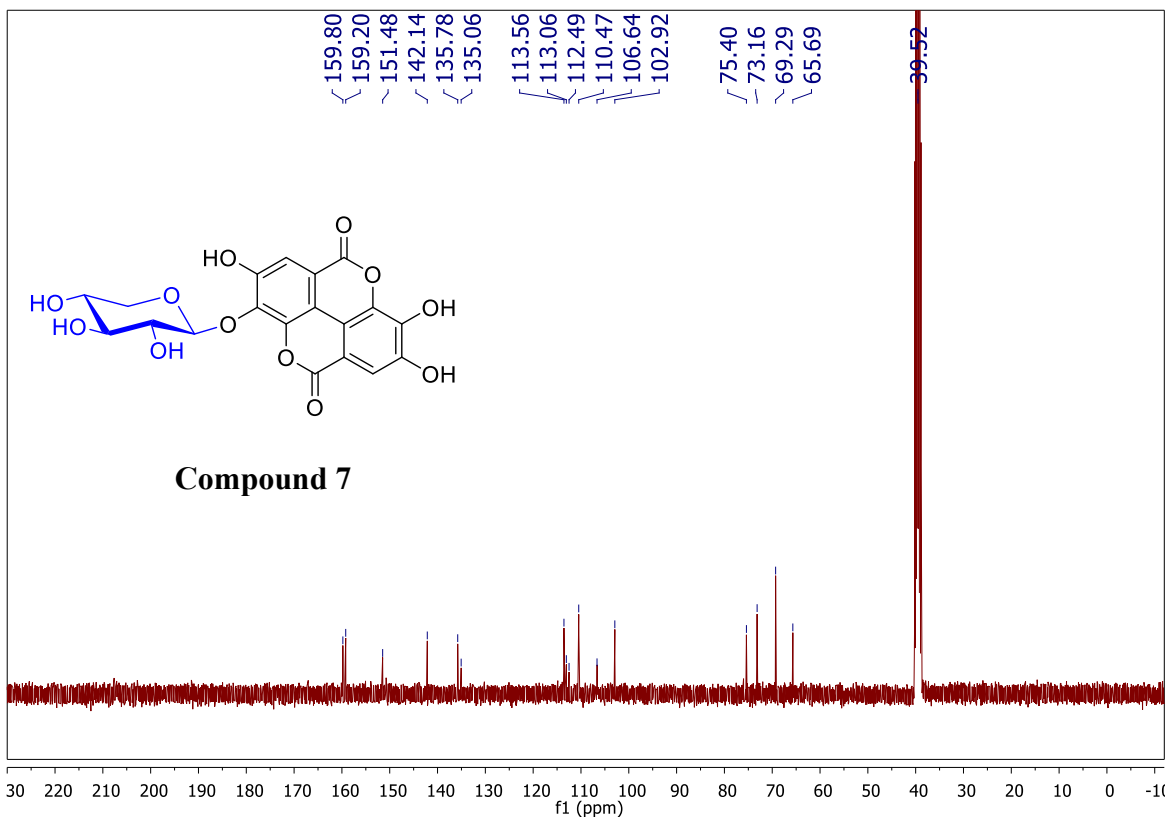

Supplement: Data_Sheet_1.pdf [file Data_Sheet_1.pdf]
